# Supplementary material for: Stable Carbon and Nitrogen Isotope Analysis for subsistence Shift and Dietary Differentiation from the Late Neolithic to the early Bronze Ages in the Central Plains, China
Source: Research Square preprint supplement (doi:10.21203/rs.3.rs-8751401/v1), 2026-02-23
Supplement: Supplementary file 1 [file b78eecb00381dd418e9c5465.docx]

**Table S2 Samples information and results for AMS 14C dating at MeiShan, Henan Province, China**

| **14C code** | **Sample No.** | **Phase** | **Material** | **14C age (BP)** | **Calendar age (cal BP)** | |
| --- | --- | --- | --- | --- | --- | --- |
| **68.2%, 1σ** | **95.4%, 2σ** |
| ZK-11192 | MS02 | Longshan | Bone | 3530±15 | 3844-3728 | 3877-3722 |
| ZK-11193 | MS05 | ErLiTou | Bone | 3225±15 | 3455-3404 | 3463-3391 |
| ZK-11194 | MS07 | Longshan | Bone | 3760±15 | 4150-4091 | 4227-4010 |
| ZK-11195 | MS13 | Longshan | Bone | 3720±15 | 4140-3995 | 4147-3985 |
| ZK-11196 | MS14 | Longshan | Bone | 3790±20 | 4231-4098 | 4240-4091 |
| ZK-11197 | MS15 | Longshan | Bone | 3590±15 | 3909-3847 | 3966-3839 |
| ZK-11198 | MS16 | ErLiTou | Bone | 3285±15 | 3550-3493 | 3561-3455 |
