# Supplementary material for: Stable Carbon and Nitrogen Isotope Analysis for subsistence Shift and Dietary Differentiation from the Late Neolithic to the early Bronze Ages in the Central Plains, China
Source: Research Square preprint supplement (doi:10.21203/rs.3.rs-8751401/v1), 2026-02-23
Supplement: Supplementary file 2 [file c878cdfbea1556716a5ba7a0.docx]

**Table S3 Stable carbon and nitrogen isotope values of human bone collagen of archaeological sites from the late Neolithic to early Bronze ages in the PSMA of the Central Plains, China.**

| **Site** | **Lab No.** | **context** | **Period** | **Sex** | **Age** | **Element** | **C**  **(%)** | **N**  **(%)** | **C/N** | **δ13C**  **(‰)** | **δ15N**  **(‰)** | **Reference** |
| --- | --- | --- | --- | --- | --- | --- | --- | --- | --- | --- | --- | --- |
| XiShan(XS) | ZK8156 | TG5M221 | Early Yangshao | Female | Adult | - |  |  |  | -11.3 | 8.5 | 1 |
| XiShan(XS) | ZK8162 | T5133M225 | Early Yangshao | Male | 30~40 | - |  |  |  | -11.6 | 8.8 | 1 |
| XiShan(XS) | ZK8183 | T3735M186 | Early Yangshao | Male | 25~30 | - |  |  |  | -11.6 | 9.8 | 1 |
| XiShan(XS) | ZK8178 | T3534M180 | Middle Yangshao | Unknown | 10 | - |  |  |  | -8.7 | 8.0 | 1 |
| XiShan(XS) | ZK8177 | T3836M183 | Middle Yangshao | Male | 30~35 | - |  |  |  | -7.3 | 8.1 | 1 |
| XiShan(XS) | ZK8184 | T3937M192 | Middle Yangshao | Unknown | Adult | - |  |  |  | -7.8 | 8.2 | 1 |
| XiShan(XS) | ZK8160 | T3636M191 | Middle Yangshao | Unknown | 15~16 | - |  |  |  | -7.9 | 8.3 | 1 |
| XiShan(XS) | ZK8168 | T5733M226 | Middle Yangshao | Male | 8 | - |  |  |  | -8.1 | 8.3 | 1 |
| XiShan(XS) | ZK8161 | T3837M189 | Middle Yangshao | Female | 18~19 | - |  |  |  | -7.8 | 8.5 | 1 |
| XiShan(XS) | ZK8174 | T5533M222 | Middle Yangshao | Female | 17~18 | - |  |  |  | -7.9 | 8.5 | 1 |
| XiShan(XS) | ZK8153 | T3937M193 | Middle Yangshao | Female | Adult | - |  |  |  | -9.0 | 8.6 | 1 |
| XiShan(XS) | ZK8159 | T4539M130 | Middle Yangshao | Female | Adult | - |  |  |  | -7.8 | 8.8 | 1 |
| XiShan(XS) | ZK8152 | T4539M88 | Middle Yangshao | Male | 25~30 | - |  |  |  | -11.3 | 8.9 | 1 |
| XiShan(XS) | ZK8157 | T3837M181 | Middle Yangshao | Male | 25~30 | - |  |  |  | -7.6 | 8.9 | 1 |
| XiShan(XS) | ZK8173 | T4539M98 | Middle Yangshao | Male | 40~45 | - |  |  |  | -7.7 | 9.0 | 1 |
| XiShan(XS) | ZK8172 | T3838M202 | Middle Yangshao | Female | Adult | - |  |  |  | -6.7 | 9.4 | 1 |
| XiShan(XS) | ZK8163 | T5533M209 | Middle Yangshao | Male | 40~45 | - |  |  |  | -8.3 | 9.6 | 1 |
| XiShan(XS) | ZK8166 | T4438M89 | Middle Yangshao | Female | 20± | - |  |  |  | -7.9 | 10.1 | 1 |
| XiShan(XS) | ZK8181 | T4338W90 | Middle Yangshao | Unknown | 3~4 | - |  |  |  | -8.2 | 10.1 | 1 |
| XiShan(XS) | ZK8179 | T3738W120 | Middle Yangshao | Unknown | 1~2 | - |  |  |  | -6.4 | 10.2 | 1 |
| XiShan(XS) | ZK8182 | T5233W186 | Middle Yangshao | Unknown | Infant | - |  |  |  | -7.6 | 10.9 | 1 |
| XiShan(XS) | ZK8180 | T5233W148 | Middle Yangshao | Unknown | Infant | - |  |  |  | -6.1 | 11.6 | 1 |
| XiShan(XS) | ZK8154 | T4739M100 | Late Yangshao | - | 7~8 | - |  |  |  | -7.9 | 7.8 | 1 |
| XiShan(XS) | ZK8149 | T4638M143 | Late Yangshao | Female | Adult | - |  |  |  | -8.0 | 8.3 | 1 |
| XiShan(XS) | ZK8189 | T4738H657① | Late Yangshao | Unknown | 6~8 | - |  |  |  | -7.2 | 8.3 | 1 |
| XiShan(XS) | ZK8148 | T4739M94② | Late Yangshao | Male | 40± | - |  |  |  | -7.7 | 8.4 | 1 |
| XiShan(XS) | ZK8185 | T4738H657② | Late Yangshao | Unknown | 40~45 | - |  |  |  | -7.5 | 8.4 | 1 |
| XiShan(XS) | ZK8175 | T3638M163 | Late Yangshao | Male | 35~40 | - |  |  |  | -7.6 | 8.6 | 1 |
| XiShan(XS) | ZK8165 | T3029M99 | Late Yangshao | Male | 45~50 | - |  |  |  | -7.0 | 8.7 | 1 |
| XiShan(XS) | ZK8170 | T3029M80 | Late Yangshao | Male | 40~45 | - |  |  |  | -7.5 | 8.7 | 1 |
| XiShan(XS) | ZK8158 | T4639M126 | Late Yangshao | Unknown | Adult | - |  |  |  | -7.7 | 8.8 | 1 |
| XiShan(XS) | ZK8169 | T4338M75 | Late Yangshao | Male | 35~40 | - |  |  |  | -7.6 | 9.0 | 1 |
| XiShan(XS) | ZK8186 | T3431H1051 | Late Yangshao | Unknown | Juvenile | - |  |  |  | -11.3 | 9.0 | 1 |
| XiShan(XS) | ZK8167 | T4439M79 | Late Yangshao | Male | 25~30 | - |  |  |  | -8.0 | 9.2 | 1 |
| XiShan(XS) | ZK8147 | T4639M127 | Late Yangshao | Male | 35~40 | - |  |  |  | -7.6 | 9.2 | 1 |
| XiShan(XS) | ZK8188 | T3434H1129 | Late Yangshao | Unknown | Unknown | - |  |  |  | -10.9 | 9.2 | 1 |
| XiShan(XS) | ZK8187 | T3931H1289 | Late Yangshao | Male | Adult | - |  |  |  | -6.7 | 9.3 | 1 |
| XiShan(XS) | ZK8176 | T2432M53 | Late Yangshao | Male | 30~35 | - |  |  |  | -8.6 | 9.6 | 1 |
| XiShan(XS) | ZK8171 | T4739M94③ | Late Yangshao | Male | 35~40 | - |  |  |  | -6.8 | 9.9 | 1 |
| TuMen(TM) |  | M30 | Middle Yangshao | - | - | Femur | 46.2 | 17.0 | 3.2 | -8.5 | 7.8 | 2 |
| TuMen(TM) |  | M1 | Middle Yangshao | - | - | Femur | 43.9 | 16.1 | 3.2 | -9.1 | 8.0 | 2 |
| TuMen(TM) |  | M3 | Middle Yangshao | - | - | Femur | 51.5 | 19.0 | 3.2 | -9.6 | 8.1 | 2 |
| TuMen(TM) |  | M28 | Middle Yangshao | - | - | Femur | 44.1 | 16.0 | 3.0 | -11.5 | 8.3 | 2 |
| TuMen(TM) |  | M31 | Middle Yangshao | - | - | Femur | 52.6 | 19.2 | 3.2 | -13.1 | 8.6 | 2 |
| TuMen(TM) |  | M32 | Middle Yangshao | - | - | Femur | 40.2 | 14.7 | 3.2 | -12.9 | 8.7 | 2 |
| TuMen(TM) |  | M2 | Middle Yangshao | - | - | Femur | 22.8 | 8.1 | 3.3 | -11.8 | 8.8 | 2 |
| QingTai(QT) |  | M4 | Middle Yangshao | Male | 30-35 | Skull | 42.1 | 15.7 | 3.1 | -7.0 | 9.8 | 3 |
| QingTai(QT) |  | M5 | Middle Yangshao | Male | 35-39 | Skull | 37.7 | 13.5 | 3.2 | -7.2 | 9.9 | 3 |
| QingTai(QT) |  | M9 | Middle Yangshao | Female | 35-40 | Femur | 44.3 | 16.4 | 3.2 | -7.3 | 9.1 | 3 |
| QingTai(QT) |  | M11 | Middle Yangshao | Male | 50＋ | Femur | 45.6 | 16.8 | 3.2 | -7.8 | 8.9 | 3 |
| QingTai(QT) |  | M15 | Middle Yangshao | Male | 30± | Femur | 28.6 | 10.3 | 3.2 | -6.7 | 9.5 | 3 |
| QingTai(QT) |  | M15 | Middle Yangshao | Male | 30± | Rib | 43.2 | 15.6 | 3.2 | -6.9 | 9.7 | 3 |
| QingTai(QT) |  | M18 | Middle Yangshao | Male | 35-40 | Femur | 43.2 | 15.7 | 3.2 | -7.7 | 9.6 | 3 |
| QingTai(QT) |  | M18 | Middle Yangshao | Male | 35-40 | Rib | 44.2 | 16.2 | 3.2 | -7.4 | 10.1 | 3 |
| QingTai(QT) |  | M21 | Middle Yangshao | Female | 30± | Femur | 37.3 | 14.3 | 3.0 | -8.2 | 10.0 | 3 |
| QingTai(QT) |  | M22 | Middle Yangshao | Male | 28-30 | Rib | 43.8 | 16.0 | 3.2 | -7.6 | 9.9 | 3 |
| QingTai(QT) |  | M25 | Middle Yangshao | Female | 30± | Femur | 40.8 | 14.9 | 3.2 | -8.0 | 8.8 | 3 |
| QingTai(QT) |  | M25 | Middle Yangshao | Female | 30± | Rib | 44.3 | 16.3 | 3.2 | -8.1 | 9.0 | 3 |
| QingTai(QT) |  | M26 | Middle Yangshao | Female | 35-39 | Radius | 33.4 | 11.6 | 3.4 | -8.8 | 8.7 | 3 |
| QingTai(QT) |  | M26 | Middle Yangshao | Female | 35-39 | Rib | 43.5 | 16.0 | 3.2 | -7.9 | 8.6 | 3 |
| QingTai(QT) |  | M33 | Middle Yangshao | Male | 35-39 | Temporal bone | 41.8 | 15.4 | 3.2 | -7.5 | 10.2 | 3 |
| QingTai(QT) |  | M43 | Middle Yangshao | Male | 40-45 | Temporal bone | 42.4 | 15.7 | 3.2 | -8.6 | 9.3 | 3 |
| QingTai(QT) |  | M44 | Middle Yangshao | Female | 23-25 | Parietal bones | 40.3 | 14.5 | 3.2 | -8.1 | 9.5 | 3 |
| QingTai(QT) |  | M48 | Middle Yangshao | Male | 40-44 | Temporal bone | 39.8 | 14.0 | 3.3 | -7.8 | 9.5 | 3 |
| QingTai(QT) |  | M51 East | Middle Yangshao | Male | Adult | Temporal bone | 43.4 | 15.9 | 3.2 | -8.6 | 9.7 | 3 |
| QingTai(QT) |  | M57 | Middle Yangshao | Male | 35-39 | Temporal bone | 40.4 | 14.3 | 3.3 | -7.5 | 10.1 | 3 |
| QingTai(QT) |  | M69 South | Middle Yangshao | Female | 25-30 | Temporal bone | 42.2 | 15.4 | 3.2 | -7.5 | 8.2 | 3 |
| QingTai(QT) |  | M69 North | Middle Yangshao | Male | 25-30 | Temporal bone | 41.1 | 14.7 | 3.3 | -7.4 | 8.8 | 3 |
| QingTai(QT) |  | M70 | Middle Yangshao | Male | 25-30 | Temporal bone | 35.9 | 12.9 | 3.2 | -9.3 | 9.2 | 3 |
| QingTai(QT) |  | M74 | Middle Yangshao | Male | 35-39 | Temporal bone | 43.4 | 15.9 | 3.2 | -7.5 | 9.9 | 3 |
| QingTai(QT) |  | M86 | Middle Yangshao | Male | 30-35 | Temporal bone | 43.6 | 15.8 | 3.2 | -7.3 | 11.7 | 3 |
| QingTai(QT) |  | M108 | Middle Yangshao | Female | 31-34 | Rib | 41.4 | 14.9 | 3.2 | -8.6 | 9.7 | 3 |
| QingTai(QT) |  | M110 | Middle Yangshao | Female | 31-34 | Rib | 42.4 | 15.5 | 3.2 | -7.6 | 8.6 | 3 |
| QingTai(QT) |  | M128 | Middle Yangshao | Female | 18-20 | Temporal bone | 40.4 | 14.5 | 3.2 | -7.0 | 10.2 | 3 |
| QingTai(QT) |  | M134 | Middle Yangshao | - | 6-7 | Rib | 39.6 | 14.1 | 3.3 | -8.6 | 9.0 | 3 |
| QingTai(QT) |  | M135 | Middle Yangshao | Female | 17-18 | Femur | 45.9 | 17.1 | 3.1 | -8.5 | 8.2 | 3 |
| QingTai(QT) |  | M135 | Middle Yangshao | Female | 17-18 | Rib | 42.7 | 15.8 | 3.1 | -8.7 | 8.4 | 3 |
| QingTai(QT) |  | M139 | Middle Yangshao | Male | 35-39 | Temporal bone | 43.8 | 16.1 | 3.2 | -8.6 | 9.1 | 3 |
| QingTai(QT) |  | M140 | Middle Yangshao | Female | 20-22 | Temporal bone | 44.4 | 16.2 | 3.2 | -10.5 | 9.9 | 3 |
| QingTai(QT) |  | M153 | Middle Yangshao | Female | 30± | Rib | 25.4 | 8.9 | 3.3 | -7.9 | 9.9 | 3 |
| QingTai(QT) |  | M156 | Middle Yangshao | Female | 23-25 | Temporal bone | 44.2 | 16.3 | 3.2 | -7.5 | 8.4 | 3 |
| QingTai(QT) |  | M163 | Middle Yangshao | Male | Adult | Rib | 41.8 | 15.4 | 3.2 | -7.5 | 7.6 | 3 |
| QingTai(QT) |  | M174 | Middle Yangshao | Male | 30-35 | Temporal bone | 40.9 | 14.5 | 3.3 | -9.7 | 8.6 | 3 |
| QingTai(QT) |  | M177 | Middle Yangshao | Male | 35-40 | Temporal bone | 39.6 | 13.8 | 3.3 | -8.6 | 8.6 | 3 |
| QingTai(QT) |  | M184 | Middle Yangshao | - | 6± | Rib | 43.1 | 15.8 | 3.2 | -8.9 | 8.4 | 3 |
| QingTai(QT) |  | M186 | Middle Yangshao | - | Adult | Tibia | 43.1 | 15.6 | 3.2 | -8.6 | 9.4 | 3 |
| QingTai(QT) |  | H406 | Middle Yangshao | Female | 20± | Rib | 43.3 | 15.7 | 3.2 | -7.9 | 8.4 | 3 |
| QingTai(QT) |  | H506 | Middle Yangshao | Male? | 15± | Temporal bone | 40.9 | 14.8 | 3.2 | -7.5 | 9.6 | 3 |
| ZhongGou(ZG) | ZG24 | H92:2South | Late Yangshao | - | - | Long bone | 41.3 | 15.1 | 3.2 | -6.8 | 6.8 | 4 |
| ZhongGou(ZG) | ZG23 | H92:1North | Late Yangshao | - | - | Long bone | 33.3 | 12.4 | 3.1 | -7.1 | 7.0 | 4 |
| ZhongGou(ZG) | ZG28 | H194 | Late Yangshao | - | - | Long bone | 37.7 | 12.4 | 3.5 | -8.3 | 7.0 | 4 |
| ZhongGou(ZG) | ZG18 | H8North | Late Yangshao | - | - | Long bone | 40.6 | 14.7 | 3.2 | -7.1 | 7.4 | 4 |
| ZhongGou(ZG) | ZG19 | H8South | Late Yangshao | - | - | Long bone | 41.7 | 15.3 | 3.2 | -6.6 | 7.6 | 4 |
| ZhongGou(ZG) | ZG26 | H126 | Late Yangshao | - | - | Long bone | 40.8 | 13.9 | 3.4 | -7.7 | 7.8 | 4 |
| ZhongGou(ZG) | ZG16 | T1M | Late Yangshao | - | - | Long bone | 42.0 | 15.3 | 3.2 | -6.1 | 8.0 | 4 |
| ZhongGou(ZG) | ZG25 | H94 | Late Yangshao | - | - | Long bone | 41.2 | 14.9 | 3.2 | -6.3 | 8.0 | 4 |
| ZhongGou(ZG) | ZG04 | M8 | Late Yangshao | - | - | Long bone | 40.1 | 14.7 | 3.2 | -6.9 | 8.1 | 4 |
| ZhongGou(ZG) | ZG20 | H10 | Late Yangshao | - | - | Long bone | 41.1 | 13.7 | 3.5 | -8.6 | 8.1 | 4 |
| ZhongGou(ZG) | ZG03 | M7 | Late Yangshao | - | - | Long bone | 38.7 | 14.0 | 3.2 | -6.5 | 8.3 | 4 |
| ZhongGou(ZG) | ZG01 | M5 | Late Yangshao | - | - | Femur | 39.6 | 14.3 | 3.2 | -7.2 | 8.4 | 4 |
| ZhongGou(ZG) | ZG15 | M23 | Late Yangshao | - | - | Long bone | 42.3 | 14.6 | 3.4 | -11.3 | 8.5 | 4 |
| ZhongGou(ZG) | ZG21 | H59 | Late Yangshao | - | - | Long bone | 31.4 | 11.7 | 3.1 | -6.5 | 8.5 | 4 |
| ZhongGou(ZG) | ZG02 | M6 | Late Yangshao | - | - | Long bone | 41.4 | 14.4 | 3.4 | -7.5 | 8.7 | 4 |
| ZhongGou(ZG) | ZG05 | M9 | Late Yangshao | - | - | Long bone | 42.7 | 14.8 | 3.4 | -7.5 | 8.7 | 4 |
| ZhongGou(ZG) | ZG08 | M12 | Late Yangshao | - | - | Long bone | 43.0 | 15.3 | 3.3 | -6.8 | 8.7 | 4 |
| ZhongGou(ZG) | ZG22 | H91 | Late Yangshao | - | - | Long bone | 40.9 | 14.4 | 3.3 | -6.6 | 8.8 | 4 |
| ZhongGou(ZG) | ZG07 | M11 | Late Yangshao | - | - | Long bone | 42.6 | 15.5 | 3.2 | -6.6 | 8.9 | 4 |
| ZhongGou(ZG) | ZG17 | T4M | Late Yangshao | - | - | Long bone | 43.3 | 15.7 | 3.2 | -7.3 | 8.9 | 4 |
| ZhongGou(ZG) | ZG13 | M17 | Late Yangshao | - | - | Long bone | 37.5 | 13.6 | 3.2 | -6.8 | 9.0 | 4 |
| ZhongGou(ZG) | ZG14 | M18 | Late Yangshao | - | - | Long bone | 42.2 | 15.4 | 3.2 | -6.9 | 9.0 | 4 |
| ZhongGou(ZG) | ZG27 | H128 | Late Yangshao | - | - | Long bone | 41.1 | 14.0 | 3.4 | -7.8 | 9.0 | 4 |
| ZhongGou(ZG) | ZG12 | M16 | Late Yangshao | - | - | Long bone | 14.1 | 5.1 | 3.2 | -9.2 | 9.1 | 4 |
| ZhongGou(ZG) | ZG09 | M13 | Late Yangshao | - | - | Long bone | 43.1 | 15.7 | 3.2 | -7.4 | 9.5 | 4 |
| ZhongGou(ZG) | ZG10 | M14 | Late Yangshao | - | - | Long bone | 43.6 | 16.0 | 3.2 | -7.4 | 9.5 | 4 |
| ZhongGou(ZG) | ZG11 | M15 | Late Yangshao | - | - | Long bone | 39.8 | 12.8 | 3.6 | -11.9 | 9.5 | 4 |
| ZhongGou(ZG) | ZG06 | M10 | Late Yangshao | - | - | Long bone | 41.3 | 15.1 | 3.2 | -7.6 | 10.1 | 4 |
| ShangGangYang(SGY) | SG3 | M3-1 | Late Yangshao |  |  | Phalange | 41.4 | 15.2 | 3.2 | -8.2 | 8.6 | 5 |
| ShangGangYang(SGY) | SG4 | M3-1 | Late Yangshao |  |  | Fibula | 42.6 | 15.4 | 3.2 | -8.5 | 8.3 | 5 |
| ShangGangYang(SGY) | SG9 | M6 | Late Yangshao |  |  | Ulna | 40.1 | 14.4 | 3.2 | -10.0 | 9.7 | 5 |
| ShangGangYang(SGY) | SG10 | M7-1 | Late Yangshao |  |  | Rib | 43.5 | 15.7 | 3.2 | -7.5 | 8.1 | 5 |
| ShangGangYang(SGY) | SG11 | M7-1 | Late Yangshao |  |  | Ulna？ | 44.2 | 16.1 | 3.2 | -7.4 | 8.2 | 5 |
| ShangGangYang(SGY) | SG14 | M9 | Late Yangshao |  |  | Tibia | 44.0 | 16.0 | 3.2 | -7.2 | 8.2 | 5 |
| ShangGangYang(SGY) | SG15 | M9 | Late Yangshao |  |  | Rib | 42.7 | 15.5 | 3.2 | -7.0 | 8.0 | 5 |
| ShangGangYang(SGY) | SG17 | M11 | Late Yangshao |  |  | Rib | 42.2 | 15.2 | 3.2 | -7.0 | 8.8 | 5 |
| ShangGangYang(SGY) | SG21 | M13 | Late Yangshao |  |  | Rib | 45.2 | 16.3 | 3.2 | -16.0 | 6.3 | 5 |
| ShangGangYang(SGY) | SG23 | M15 | Late Yangshao |  |  | Rib | 40.2 | 14.7 | 3.2 | -7.7 | 9.1 | 5 |
| ShangGangYang(SGY) | SG30 | M21 | Late Yangshao |  |  | Rib | 41.6 | 15.0 | 3.2 | -8.3 | 9.5 | 5 |
| ShangGangYang(SGY) | SG34 | M23 | Late Yangshao |  |  | Rib | 42.4 | 15.3 | 3.2 | -7.8 | 9.8 | 5 |
| ShangGangYang(SGY) | SG37 | M24 | Late Yangshao |  |  | Left humerus | 41.5 | 14.9 | 3.2 | -8.7 | 8.4 | 5 |
| ShangGangYang(SGY) | SG45 | M29 | Late Yangshao |  |  | Rib | 38.7 | 13.9 | 3.2 | -9.2 | 7.8 | 5 |
| ShangGangYang(SGY) | SG47 | M30 | Late Yangshao |  |  | Rib | 42.3 | 15.4 | 3.2 | -8.5 | 10.5 | 5 |
| ShangGangYang(SGY) | SG49 | M31 | Late Yangshao |  |  | Phalange | 43.3 | 15.7 | 3.2 | -8.5 | 9.9 | 5 |
| ShangGangYang(SGY) | SG5 | M4 | Late Yangshao |  |  | Femur | 43.5 | 15.3 | 3.3 | -7.9 | 7.9 | 5 |
| ShangGangYang(SGY) | SG22 | M13 | Late Yangshao |  |  | Limb | 41.7 | 14.9 | 3.3 | -15.8 | 6.6 | 5 |
| ShangGangYang(SGY) | SG26 | M18 | Late Yangshao |  |  | Humerus | 42.6 | 15.3 | 3.3 | -7.8 | 8.5 | 5 |
| ShangGangYang(SGY) | SG31 | M21 | Late Yangshao |  |  | Radius | 45.0 | 16.1 | 3.3 | -7.8 | 9.1 | 5 |
| ShangGangYang(SGY) | SG32 | M22 | Late Yangshao |  |  | Rib | 44.9 | 16.0 | 3.3 | -8.2 | 9.5 | 5 |
| ShangGangYang(SGY) | SG38 | M25 | Late Yangshao |  |  | Rib | 39.3 | 13.9 | 3.3 | -8.3 | 9.6 | 5 |
| ShangGangYang(SGY) | SG51 | M31 | Late Yangshao |  |  | Rib | 40.7 | 14.5 | 3.3 | -8.2 | 9.7 | 5 |
| ShangGangYang(SGY) | SG52 | M32 | Late Yangshao |  |  | Rib | 40.7 | 14.5 | 3.3 | -7.9 | 9.1 | 5 |
| ShangGangYang(SGY) | SG56 | M35 | Late Yangshao |  |  | Rib | 42.1 | 15.0 | 3.3 | -7.7 | 9.8 | 5 |
| ShangGangYang(SGY) | SG19 | M12 | Late Yangshao |  |  | Rib | 43.1 | 14.8 | 3.4 | -7.7 | 9.4 | 5 |
| SunZhuang(SZ) |  | M49 | Late Yangshao |  |  | Femur | 43.1 | 16.7 | 3.0 | -8.4 | 8.5 | 6 |
| SunZhuang(SZ) |  | M45 | Late Yangshao |  |  | Femur | 48.9 | 18.2 | 3.1 | -8.0 | 9.4 | 6 |
| SunZhuang(SZ) |  | M47 | Late Yangshao |  |  | Femur | 41.1 | 15.1 | 3.2 | -8.7 | 8.5 | 6 |
| SunZhuang(SZ) |  | M48 | Late Yangshao |  |  | Femur | 41.1 | 15.1 | 3.2 | -8.1 | 8.8 | 6 |
| SunZhuang(SZ) |  | M50 | Late Yangshao |  |  | Femur | 45.7 | 16.7 | 3.2 | -8.6 | 8.8 | 6 |
| SunZhuang(SZ) |  | M51 | Late Yangshao |  |  | Femur | 41.3 | 15.2 | 3.2 | -8.0 | 9.4 | 6 |
| SunZhuang(SZ) |  | M53 | Late Yangshao |  |  | Femur | 45.2 | 16.3 | 3.2 | -8.1 | 8.7 | 6 |
| SunZhuang(SZ) |  | M54 | Late Yangshao |  |  | Femur | 42.1 | 15.4 | 3.2 | -7.5 | 9.0 | 6 |
| SunZhuang(SZ) |  | M56 | Late Yangshao |  |  | Femur | 43.8 | 16.0 | 3.2 | -8.4 | 9.7 | 6 |
| SunZhuang(SZ) |  | M59 | Late Yangshao |  |  | Femur | 46.7 | 16.8 | 3.2 | -8.1 | 9.0 | 6 |
| SunZhuang(SZ) |  | M62 | Late Yangshao |  |  | Femur | 37.7 | 13.7 | 3.2 | -8.1 | 8.4 | 6 |
| SunZhuang(SZ) |  | M64 | Late Yangshao |  |  | Femur | 45.2 | 16.4 | 3.2 | -8.1 | 9.5 | 6 |
| SunZhuang(SZ) |  | M65 | Late Yangshao |  |  | Femur | 45.1 | 16.5 | 3.2 | -8.3 | 8.7 | 6 |
| SunZhuang(SZ) |  | M70 | Late Yangshao |  |  | Femur | 56.5 | 20.7 | 3.2 | -9.0 | 9.0 | 6 |
| SunZhuang(SZ) |  | M71 | Late Yangshao |  |  | Femur | 37.3 | 13.5 | 3.2 | -7.5 | 8.0 | 6 |
| SunZhuang(SZ) |  | M73 | Late Yangshao |  |  | Femur | 47.1 | 17.1 | 3.2 | -7.5 | 9.1 | 6 |
| SunZhuang(SZ) |  | M75 | Late Yangshao |  |  | Femur | 44.9 | 16.4 | 3.2 | -7.8 | 9.2 | 6 |
| SunZhuang(SZ) |  | M80 | Late Yangshao |  |  | Femur | 42.9 | 15.7 | 3.2 | -7.9 | 9.0 | 6 |
| SunZhuang(SZ) |  | M82 | Late Yangshao |  |  | Femur | 43.6 | 15.7 | 3.2 | -8.5 | 8.3 | 6 |
| SunZhuang(SZ) |  | M85 | Late Yangshao |  |  | Femur | 45.3 | 16.3 | 3.2 | -8.6 | 9.5 | 6 |
| SunZhuang(SZ) |  | M87 | Late Yangshao |  |  | Femur | 43.6 | 15.7 | 3.2 | -8.1 | 9.4 | 6 |
| SunZhuang(SZ) |  | M88 | Late Yangshao |  |  | Femur | 58.2 | 21.4 | 3.2 | -7.9 | 8.9 | 6 |
| SunZhuang(SZ) |  | M90 | Late Yangshao |  |  | Femur | 47.5 | 17.3 | 3.2 | -8.6 | 9.5 | 6 |
| SunZhuang(SZ) |  | M91 | Late Yangshao |  |  | Femur | 44.0 | 16.1 | 3.2 | -7.8 | 8.6 | 6 |
| SunZhuang(SZ) |  | M93 | Late Yangshao |  |  | Femur | 46.2 | 16.8 | 3.2 | -8.0 | 9.4 | 6 |
| SunZhuang(SZ) |  | M94 | Late Yangshao |  |  | Femur | 44.1 | 16.0 | 3.2 | -8.4 | 9.2 | 6 |
| SunZhuang(SZ) |  | M96 | Late Yangshao |  |  | Femur | 44.9 | 16.2 | 3.2 | -8.0 | 9.9 | 6 |
| SunZhuang(SZ) |  | M57 | Late Yangshao |  |  | Femur | 38.3 | 13.6 | 3.3 | -10.1 | 9.4 | 6 |
| SunZhuang(SZ) |  | M63 | Late Yangshao |  |  | Femur | 43.7 | 15.5 | 3.3 | -8.5 | 9.5 | 6 |
| SunZhuang(SZ) |  | M66 | Late Yangshao |  |  | Femur | 42.0 | 15.0 | 3.3 | -7.6 | 9.0 | 6 |
| SunZhuang(SZ) |  | M67 | Late Yangshao |  |  | Femur | 44.5 | 15.8 | 3.3 | -8.1 | 9.4 | 6 |
| SunZhuang(SZ) |  | M69 | Late Yangshao |  |  | Femur | 41.9 | 14.7 | 3.3 | -8.7 | 8.7 | 6 |
| SunZhuang(SZ) |  | M72 | Late Yangshao |  |  | Femur | 44.8 | 15.8 | 3.3 | -8.5 | 9.2 | 6 |
| SunZhuang(SZ) |  | M74 | Late Yangshao |  |  | Femur | 47.6 | 17.1 | 3.3 | -8.8 | 9.1 | 6 |
| SunZhuang(SZ) |  | M78 | Late Yangshao |  |  | Femur | 43.9 | 15.4 | 3.3 | -7.8 | 9.1 | 6 |
| SunZhuang(SZ) |  | M79 | Late Yangshao |  |  | Femur | 44.1 | 15.5 | 3.3 | -9.1 | 9.2 | 6 |
| SunZhuang(SZ) |  | M84 | Late Yangshao |  |  | Femur | 43.4 | 15.3 | 3.3 | -9.2 | 9.5 | 6 |
| SunZhuang(SZ) |  | M86 | Late Yangshao |  |  | Femur | 43.1 | 15.2 | 3.3 | -8.5 | 8.6 | 6 |
| SunZhuang(SZ) |  | M89 | Late Yangshao |  |  | Femur | 39.9 | 14.1 | 3.3 | -9.1 | 8.3 | 6 |
| SunZhuang(SZ) |  | M92 | Late Yangshao |  |  | Femur | 42.3 | 15.1 | 3.3 | -8.6 | 9.1 | 6 |
| SunZhuang(SZ) |  | M95 | Late Yangshao |  |  | Femur | 39.4 | 13.8 | 3.3 | -8.9 | 8.9 | 6 |
| SunZhuang(SZ) |  | M77 | Late Yangshao |  |  | Femur | 45.4 | 15.8 | 3.4 | -8.2 | 8.6 | 6 |
| SunZhuang(SZ) |  | M81 | Late Yangshao |  |  | Femur | 37.9 | 13.1 | 3.4 | -9.3 | 9.0 | 6 |
| SunZhuang(SZ) |  | M68 | Late Yangshao |  |  | Femur | 44.9 | 15.7 | 3.5 | -8.8 | 10.1 | 6 |
| SunZhuang(SZ) |  | M76 | Late Yangshao |  |  | Femur | 43.4 | 14.3 | 3.5 | -10.6 | 9.3 | 6 |
| WangGou(WG) |  | G1:14 | Late Yangshao |  |  | Femur | 41.3 | 15.3 | 3.1 | -9.0 | 9.0 | 6 |
| WangGou(WG) |  | H18 | Late Yangshao |  |  | Femur | 43.2 | 16.1 | 3.1 | -7.1 | 7.7 | 6 |
| WangGou(WG) |  | H202 | Late Yangshao |  |  | Femur | 42.7 | 15.4 | 3.2 | -7.8 | 9.3 | 6 |
| WangGou(WG) |  | H35:1 | Late Yangshao |  |  | Femur | 43.7 | 15.9 | 3.2 | -8.6 | 7.5 | 6 |
| WangGou(WG) |  | H35:2 | Late Yangshao |  |  | Femur | 53.6 | 19.7 | 3.2 | -6.9 | 9.8 | 6 |
| WangGou(WG) |  | H35:3 | Late Yangshao |  |  | Femur | 41.0 | 15.0 | 3.2 | -7.9 | 8.9 | 6 |
| WangGou(WG) |  | H98 | Late Yangshao |  |  | Femur | 33.9 | 12.3 | 3.2 | -7.6 | 8.3 | 6 |
| WangGou(WG) |  | M1 | Late Yangshao |  |  | Femur | 47.7 | 17.7 | 3.2 | -9.2 | 10.1 | 6 |
| WangGou(WG) |  | M1 | Late Yangshao |  |  | Femur | 49.7 | 18.7 | 3.1 | -7.3 | 8.5 | 6 |
| WangGou(WG) |  | M1(north) | Late Yangshao |  |  | Femur | 43.3 | 16.3 | 3.1 | -16.2 | 9.0 | 6 |
| WangGou(WG) |  | M1(south) | Late Yangshao |  |  | Femur | 64.2 | 24.0 | 3.1 | -14.4 | 8.9 | 6 |
| WangGou(WG) |  | M10 | Late Yangshao |  |  | Femur | 42.1 | 15.6 | 3.1 | -8.0 | 8.5 | 6 |
| WangGou(WG) |  | M100 | Late Yangshao |  |  | Femur | 43.2 | 15.9 | 3.2 | -14.1 | 11.1 | 6 |
| WangGou(WG) |  | M104 | Late Yangshao |  |  | Femur | 42.9 | 15.7 | 3.2 | -9.3 | 10.9 | 6 |
| WangGou(WG) |  | M105 | Late Yangshao |  |  | Femur | 40.5 | 15.1 | 3.1 | -7.8 | 9.2 | 6 |
| WangGou(WG) |  | M107 | Late Yangshao |  |  | Femur | 37.1 | 13.5 | 3.2 | -9.4 | 9.1 | 6 |
| WangGou(WG) |  | M108(north) | Late Yangshao |  |  | Femur | 48.2 | 17.9 | 3.1 | -9.9 | 10.7 | 6 |
| WangGou(WG) |  | M108(south) | Late Yangshao |  |  | Femur | 43.7 | 15.4 | 3.3 | -11.6 | 10.5 | 6 |
| WangGou(WG) |  | M109 | Late Yangshao |  |  | Femur | 44.7 | 15.9 | 3.3 | -9.7 | 9.8 | 6 |
| WangGou(WG) |  | M11 | Late Yangshao |  |  | Femur | 41.1 | 15.2 | 3.1 | -9.5 | 8.1 | 6 |
| WangGou(WG) |  | M11 | Late Yangshao |  |  | Femur | 43.0 | 16.0 | 3.1 | -7.2 | 9.9 | 6 |
| WangGou(WG) |  | M110 | Late Yangshao |  |  | Femur | 43.2 | 15.3 | 3.3 | -8.9 | 9.1 | 6 |
| WangGou(WG) |  | M111 | Late Yangshao |  |  | Femur | 42.7 | 15.5 | 3.2 | -8.5 | 8.8 | 6 |
| WangGou(WG) |  | M112 | Late Yangshao |  |  | Femur | 43.3 | 15.8 | 3.2 | -8.4 | 8.3 | 6 |
| WangGou(WG) |  | M114 | Late Yangshao |  |  | Femur | 40.1 | 13.8 | 3.4 | -10.7 | 11.3 | 6 |
| WangGou(WG) |  | M115 | Late Yangshao |  |  | Femur | 33.1 | 11.4 | 3.4 | -10.7 | 11.4 | 6 |
| WangGou(WG) |  | M116 | Late Yangshao |  |  | Femur | 39.9 | 13.5 | 3.4 | -16.3 | 7.7 | 6 |
| WangGou(WG) |  | M117 | Late Yangshao |  |  | Femur | 41.3 | 15.2 | 3.2 | -8.0 | 9.4 | 6 |
| WangGou(WG) |  | M118 | Late Yangshao |  |  | Femur | 43.9 | 16.2 | 3.2 | -9.3 | 10.3 | 6 |
| WangGou(WG) |  | M119 | Late Yangshao |  |  | Femur | 41.3 | 14.5 | 3.3 | -10.9 | 10.9 | 6 |
| WangGou(WG) |  | M12 | Late Yangshao |  |  | Femur | 41.8 | 15.4 | 3.2 | -7.6 | 8.6 | 6 |
| WangGou(WG) |  | M121 | Late Yangshao |  |  | Femur | 42.0 | 15.3 | 3.2 | -8.1 | 8.5 | 6 |
| WangGou(WG) |  | M122 | Late Yangshao |  |  | Femur | 40.1 | 14.6 | 3.2 | -8.2 | 8.9 | 6 |
| WangGou(WG) |  | M126 | Late Yangshao |  |  | Femur | 38.1 | 13.8 | 3.2 | -8.6 | 9.0 | 6 |
| WangGou(WG) |  | M127 | Late Yangshao |  |  | Femur | 40.9 | 14.3 | 3.3 | -10.9 | 8.6 | 6 |
| WangGou(WG) |  | M13 | Late Yangshao |  |  | Femur | 42.7 | 15.8 | 3.2 | -8.4 | 9.4 | 6 |
| WangGou(WG) |  | M130 | Late Yangshao |  |  | Femur | 39.8 | 14.5 | 3.2 | -8.7 | 9.3 | 6 |
| WangGou(WG) |  | M132 | Late Yangshao |  |  | Femur | 44.4 | 16.5 | 3.1 | -8.2 | 8.9 | 6 |
| WangGou(WG) |  | M133 | Late Yangshao |  |  | Femur | 38.7 | 13.6 | 3.3 | -9.1 | 9.6 | 6 |
| WangGou(WG) |  | M134 | Late Yangshao |  |  | Femur | 44.9 | 14.5 | 3.6 | -10.2 | 9.5 | 6 |
| WangGou(WG) |  | M136 | Late Yangshao |  |  | Femur | 43.0 | 15.5 | 3.2 | -8.8 | 8.5 | 6 |
| WangGou(WG) |  | M137 | Late Yangshao |  |  | Femur | 43.0 | 15.5 | 3.2 | -9.5 | 8.6 | 6 |
| WangGou(WG) |  | M139 | Late Yangshao |  |  | Femur | 45.7 | 16.8 | 3.2 | -8.5 | 8.5 | 6 |
| WangGou(WG) |  | M14 | Late Yangshao |  |  | Femur | 42.7 | 15.7 | 3.2 | -7.3 | 8.7 | 6 |
| WangGou(WG) |  | M140 | Late Yangshao |  |  | Femur | 43.1 | 15.9 | 3.2 | -7.0 | 9.5 | 6 |
| WangGou(WG) |  | M141 | Late Yangshao |  |  | Femur | 48.0 | 17.3 | 3.2 | -16.6 | 8.9 | 6 |
| WangGou(WG) |  | M143 | Late Yangshao |  |  | Femur | 44.4 | 16.7 | 3.1 | -8.6 | 8.9 | 6 |
| WangGou(WG) |  | M15 | Late Yangshao |  |  | Femur | 55.4 | 20.8 | 3.1 | -8.1 | 9.1 | 6 |
| WangGou(WG) |  | M16 | Late Yangshao |  |  | Femur | 42.9 | 15.8 | 3.2 | -8.4 | 8.8 | 6 |
| WangGou(WG) |  | M16 | Late Yangshao |  |  | Femur | 43.9 | 16.1 | 3.2 | -8.9 | 9.9 | 6 |
| WangGou(WG) |  | M17 | Late Yangshao |  |  | Femur | 44.3 | 16.3 | 3.2 | -8.7 | 9.5 | 6 |
| WangGou(WG) |  | M18 | Late Yangshao |  |  | Femur | 41.8 | 15.5 | 3.1 | -8.1 | 9.6 | 6 |
| WangGou(WG) |  | M19 | Late Yangshao |  |  | Femur | 44.2 | 16.2 | 3.2 | -8.1 | 9.2 | 6 |
| WangGou(WG) |  | M19 | Late Yangshao |  |  | Femur | 44.8 | 16.1 | 3.3 | -9.1 | 9.7 | 6 |
| WangGou(WG) |  | M2 | Late Yangshao |  |  | Femur | 42.3 | 15.5 | 3.2 | -9.0 | 9.6 | 6 |
| WangGou(WG) |  | M20 | Late Yangshao |  |  | Femur | 44.1 | 16.3 | 3.2 | -8.5 | 11.0 | 6 |
| WangGou(WG) |  | M20 | Late Yangshao |  |  | Femur | 44.3 | 16.4 | 3.2 | -8.4 | 9.4 | 6 |
| WangGou(WG) |  | M23 | Late Yangshao |  |  | Femur | 43.1 | 15.8 | 3.2 | -8.0 | 9.3 | 6 |
| WangGou(WG) |  | M23 | Late Yangshao |  |  | Femur | 47.8 | 17.9 | 3.1 | -7.7 | 9.3 | 6 |
| WangGou(WG) |  | M24 | Late Yangshao |  |  | Femur | 41.9 | 15.5 | 3.2 | -7.7 | 9.4 | 6 |
| WangGou(WG) |  | M24 | Late Yangshao |  |  | Femur | 42.4 | 15.4 | 3.2 | -8.8 | 8.3 | 6 |
| WangGou(WG) |  | M25 | Late Yangshao |  |  | Femur | 44.4 | 16.6 | 3.1 | -8.1 | 9.0 | 6 |
| WangGou(WG) |  | M26 | Late Yangshao |  |  | Femur | 39.6 | 14.4 | 3.2 | -8.5 | 9.1 | 6 |
| WangGou(WG) |  | M27 | Late Yangshao |  |  | Femur | 42.2 | 15.5 | 3.2 | -8.7 | 8.8 | 6 |
| WangGou(WG) |  | M28 | Late Yangshao |  |  | Femur | 40.5 | 14.8 | 3.2 | -8.1 | 9.1 | 6 |
| WangGou(WG) |  | M28 | Late Yangshao |  |  | Femur | 41.5 | 15.2 | 3.2 | -7.6 | 8.8 | 6 |
| WangGou(WG) |  | M29 | Late Yangshao |  |  | Femur | 31.7 | 11.5 | 3.2 | -8.3 | 8.8 | 6 |
| WangGou(WG) |  | M29 | Late Yangshao |  |  | Femur | 41.2 | 15.3 | 3.1 | -7.1 | 8.4 | 6 |
| WangGou(WG) |  | M3 | Late Yangshao |  |  | Femur | 45.2 | 16.3 | 3.2 | -8.8 | 9.0 | 6 |
| WangGou(WG) |  | M3(north) | Late Yangshao |  |  | Femur | 45.0 | 16.6 | 3.2 | -14.3 | 8.2 | 6 |
| WangGou(WG) |  | M3(south) | Late Yangshao |  |  | Femur | 43.1 | 16.1 | 3.1 | -15.9 | 9.0 | 6 |
| WangGou(WG) |  | M31 | Late Yangshao |  |  | Femur | 44.8 | 16.3 | 3.2 | -8.6 | 8.3 | 6 |
| WangGou(WG) |  | M33 | Late Yangshao |  |  | Femur | 42.9 | 15.9 | 3.2 | -8.4 | 9.1 | 6 |
| WangGou(WG) |  | M34 | Late Yangshao |  |  | Femur | 34.9 | 12.2 | 3.3 | -9.3 | 8.7 | 6 |
| WangGou(WG) |  | M35 | Late Yangshao |  |  | Femur | 42.0 | 15.8 | 3.1 | -8.3 | 8.9 | 6 |
| WangGou(WG) |  | M35 | Late Yangshao |  |  | Femur | 44.4 | 16.8 | 3.1 | -8.7 | 9.1 | 6 |
| WangGou(WG) |  | M36 | Late Yangshao |  |  | Femur | 42.7 | 15.8 | 3.1 | -8.5 | 8.6 | 6 |
| WangGou(WG) |  | M36 | Late Yangshao |  |  | Femur | 43.8 | 16.1 | 3.2 | -8.6 | 9.2 | 6 |
| WangGou(WG) |  | M37 | Late Yangshao |  |  | Femur | 41.0 | 14.9 | 3.2 | -8.2 | 8.9 | 6 |
| WangGou(WG) |  | M38 | Late Yangshao |  |  | Femur | 42.7 | 15.9 | 3.1 | -8.0 | 7.8 | 6 |
| WangGou(WG) |  | M38 | Late Yangshao |  |  | Femur | 45.3 | 16.6 | 3.2 | -7.9 | 8.8 | 6 |
| WangGou(WG) |  | M39 | Late Yangshao |  |  | Femur | 41.9 | 15.3 | 3.2 | -9.2 | 11.9 | 6 |
| WangGou(WG) |  | M39 | Late Yangshao |  |  | Femur | 82.6 | 30.0 | 3.2 | -7.5 | 8.6 | 6 |
| WangGou(WG) |  | M4 | Late Yangshao |  |  | Femur | 43.7 | 16.2 | 3.2 | -7.9 | 9.3 | 6 |
| WangGou(WG) |  | M40 | Late Yangshao |  |  | Femur | 43.5 | 16.0 | 3.2 | -8.7 | 10.3 | 6 |
| WangGou(WG) |  | M40 | Late Yangshao |  |  | Femur | 44.4 | 16.3 | 3.2 | -8.6 | 9.7 | 6 |
| WangGou(WG) |  | M41 | Late Yangshao |  |  | Femur | 40.5 | 14.7 | 3.2 | -7.9 | 9.2 | 6 |
| WangGou(WG) |  | M43 | Late Yangshao |  |  | Femur | 43.2 | 15.9 | 3.2 | -8.1 | 9.5 | 6 |
| WangGou(WG) |  | M43 | Late Yangshao |  |  | Femur | 46.9 | 16.9 | 3.2 | -9.1 | 9.6 | 6 |
| WangGou(WG) |  | M44 | Late Yangshao |  |  | Femur | 42.8 | 15.8 | 3.2 | -8.2 | 8.7 | 6 |
| WangGou(WG) |  | M45 | Late Yangshao |  |  | Femur | 44.5 | 16.4 | 3.2 | -8.5 | 9.1 | 6 |
| WangGou(WG) |  | M46 | Late Yangshao |  |  | Femur | 43.1 | 14.8 | 3.4 | -9.6 | 8.8 | 6 |
| WangGou(WG) |  | M47 | Late Yangshao |  |  | Femur | 40.4 | 14.5 | 3.3 | -9.1 | 9.0 | 6 |
| WangGou(WG) |  | M48 | Late Yangshao |  |  | Femur | 48.0 | 17.5 | 3.2 | -8.6 | 9.1 | 6 |
| WangGou(WG) |  | M5 | Late Yangshao |  |  | Femur | 41.9 | 14.6 | 3.4 | -8.6 | 9.3 | 6 |
| WangGou(WG) |  | M50 | Late Yangshao |  |  | Femur | 34.5 | 12.5 | 3.2 | -8.4 | 12.1 | 6 |
| WangGou(WG) |  | M51 | Late Yangshao |  |  | Femur | 43.8 | 16.3 | 3.1 | -7.9 | 8.9 | 6 |
| WangGou(WG) |  | M52 | Late Yangshao |  |  | Femur | 44.3 | 16.5 | 3.1 | -6.9 | 8.8 | 6 |
| WangGou(WG) |  | M55 | Late Yangshao |  |  | Femur | 42.3 | 16.0 | 3.1 | -7.8 | 9.5 | 6 |
| WangGou(WG) |  | M56 | Late Yangshao |  |  | Femur | 44.5 | 16.5 | 3.1 | -15.8 | 7.5 | 6 |
| WangGou(WG) |  | M56 | Late Yangshao |  |  | Femur | 47.4 | 17.6 | 3.2 | -8.3 | 8.7 | 6 |
| WangGou(WG) |  | M57 | Late Yangshao |  |  | Femur | 49.3 | 18.3 | 3.1 | -8.0 | 8.5 | 6 |
| WangGou(WG) |  | M58 | Late Yangshao |  |  | Femur | 44.4 | 15.7 | 3.3 | -9.1 | 7.9 | 6 |
| WangGou(WG) |  | M59 | Late Yangshao |  |  | Femur | 45.1 | 16.7 | 3.2 | -8.4 | 9.7 | 6 |
| WangGou(WG) |  | M59(west) | Late Yangshao |  |  | Femur | 42.1 | 15.4 | 3.2 | -8.4 | 9.6 | 6 |
| WangGou(WG) |  | M60 | Late Yangshao |  |  | Femur | 46.1 | 17.4 | 3.1 | -8.1 | 9.1 | 6 |
| WangGou(WG) |  | M61 | Late Yangshao |  |  | Femur | 42.8 | 15.8 | 3.2 | -10.1 | 9.8 | 6 |
| WangGou(WG) |  | M62 | Late Yangshao |  |  | Femur | 47.2 | 17.1 | 3.2 | -7.7 | 8.6 | 6 |
| WangGou(WG) |  | M63 | Late Yangshao |  |  | Femur | 52.4 | 19.4 | 3.1 | -8.1 | 9.7 | 6 |
| WangGou(WG) |  | M64 | Late Yangshao |  |  | Femur | 43.4 | 16.1 | 3.2 | -8.4 | 8.5 | 6 |
| WangGou(WG) |  | M65 | Late Yangshao |  |  | Femur | 43.8 | 16.2 | 3.2 | -7.5 | 9.5 | 6 |
| WangGou(WG) |  | M65 | Late Yangshao |  |  | Femur | 49.1 | 18.0 | 3.2 | -9.1 | 10.7 | 6 |
| WangGou(WG) |  | M66 | Late Yangshao |  |  | Femur | 43.3 | 15.9 | 3.2 | -8.1 | 9.5 | 6 |
| WangGou(WG) |  | M67 | Late Yangshao |  |  | Femur | 45.0 | 16.6 | 3.2 | -7.8 | 8.7 | 6 |
| WangGou(WG) |  | M67 | Late Yangshao |  |  | Femur | 59.8 | 22.2 | 3.1 | -9.9 | 10.7 | 6 |
| WangGou(WG) |  | M68 | Late Yangshao |  |  | Femur | 42.9 | 15.0 | 3.3 | -9.7 | 8.6 | 6 |
| WangGou(WG) |  | M70 | Late Yangshao |  |  | Femur | 44.8 | 16.6 | 3.2 | -8.0 | 8.7 | 6 |
| WangGou(WG) |  | M72 | Late Yangshao |  |  | Femur | 43.0 | 15.6 | 3.2 | -8.6 | 10.5 | 6 |
| WangGou(WG) |  | M72 | Late Yangshao |  |  | Femur | 43.6 | 16.4 | 3.1 | -8.5 | 8.7 | 6 |
| WangGou(WG) |  | M73 | Late Yangshao |  |  | Femur | 42.8 | 15.5 | 3.2 | -8.4 | 11.5 | 6 |
| WangGou(WG) |  | M74 | Late Yangshao |  |  | Femur | 30.5 | 10.8 | 3.3 | -12.0 | 12.7 | 6 |
| WangGou(WG) |  | M76(north) | Late Yangshao |  |  | Femur | 44.6 | 15.8 | 3.3 | -8.7 | 8.3 | 6 |
| WangGou(WG) |  | M76(south) | Late Yangshao |  |  | Femur | 42.0 | 15.5 | 3.2 | -7.7 | 8.9 | 6 |
| WangGou(WG) |  | M77 | Late Yangshao |  |  | Femur | 43.2 | 15.9 | 3.2 | -7.1 | 10.5 | 6 |
| WangGou(WG) |  | M77 | Late Yangshao |  |  | Femur | 45.1 | 16.6 | 3.2 | -7.5 | 9.2 | 6 |
| WangGou(WG) |  | M8 | Late Yangshao |  |  | Femur | 45.7 | 16.7 | 3.2 | -8.5 | 8.6 | 6 |
| WangGou(WG) |  | M80 | Late Yangshao |  |  | Femur | 50.3 | 18.4 | 3.2 | -8.6 | 9.0 | 6 |
| WangGou(WG) |  | M82 | Late Yangshao |  |  | Femur | 43.5 | 15.8 | 3.2 | -10.8 | 11.2 | 6 |
| WangGou(WG) |  | M83 | Late Yangshao |  |  | Femur | 44.7 | 16.6 | 3.1 | -9.0 | 11.0 | 6 |
| WangGou(WG) |  | M84 | Late Yangshao |  |  | Femur | 45.0 | 16.4 | 3.2 | -10.4 | 10.2 | 6 |
| WangGou(WG) |  | M88 | Late Yangshao |  |  | Femur | 40.6 | 14.8 | 3.2 | -7.8 | 8.6 | 6 |
| WangGou(WG) |  | M89 | Late Yangshao |  |  | Femur | 44.4 | 16.7 | 3.1 | -8.3 | 9.2 | 6 |
| WangGou(WG) |  | M9 | Late Yangshao |  |  | Femur | 44.0 | 16.4 | 3.1 | -8.1 | 8.8 | 6 |
| WangGou(WG) |  | M91 | Late Yangshao |  |  | Femur | 41.6 | 15.3 | 3.2 | -7.6 | 9.8 | 6 |
| WangGou(WG) |  | M93 | Late Yangshao |  |  | Femur | 44.6 | 16.8 | 3.1 | -8.7 | 8.5 | 6 |
| WangGou(WG) |  | M94 | Late Yangshao |  |  | Femur | 49.5 | 18.2 | 3.2 | -8.6 | 10.6 | 6 |
| WangGou(WG) |  | M95 | Late Yangshao |  |  | Femur | 42.9 | 14.6 | 3.4 | -10.7 | 10.0 | 6 |
| WangGou(WG) |  | M96 | Late Yangshao |  |  | Femur | 43.7 | 16.3 | 3.1 | -7.7 | 9.1 | 6 |
| WangGou(WG) |  | M97 | Late Yangshao |  |  | Femur | 42.6 | 15.8 | 3.2 | -9.4 | 12.5 | 6 |
| WangGou(WG) |  | M99 | Late Yangshao |  |  | Femur | 39.7 | 14.3 | 3.2 | -7.8 | 7.4 | 6 |
| WangGou(WG) |  | T1634 7 | Late Yangshao |  |  | Femur | 36.3 | 13.1 | 3.2 | -7.5 | 7.4 | 6 |
| WangGeDang(WGD) | WGD10 | H14 | Longshan culture | - | - | Long bone | 43.5 | 15.3 | 3.3 | -8.8 | 6.9 | 4 |
| WangGeDang(WGD) | WGD12 | H61 | Longshan culture | - | - | Fibula | 41.1 | 14.0 | 3.4 | -9.0 | 7.9 | 4 |
| WangGeDang(WGD) | WGD08 | M24A | Longshan culture | - | - | Femur | 43.9 | 15.3 | 3.3 | -9.7 | 8.1 | 4 |
| WangGeDang(WGD) | WGD11 | H61North | Longshan culture | - | - | Long bone | 29.6 | 10.0 | 3.4 | -9.5 | 8.1 | 4 |
| WangGeDang(WGD) | WGD13 | H73 | Longshan culture | - | - | Femur | 42.6 | 14.9 | 3.3 | -9.8 | 8.1 | 4 |
| WangGeDang(WGD) | WGD09 | M24B | Longshan culture | - | - | Femur | 45.0 | 16.4 | 3.2 | -10.4 | 8.2 | 4 |
| WangGeDang(WGD) | WGD01 | M6 | Longshan culture | - | - | Femur | 21.9 | 7.9 | 3.2 | -9.0 | 8.7 | 4 |
| WangGeDang(WGD) | WGD14 | H80 | Longshan culture | - | - | Phalanx | 41.6 | 15.2 | 3.2 | -7.7 | 8.7 | 4 |
| WangGeDang(WGD) | WGD07 | M22 | Longshan culture | - | - | Femur | 32.5 | 10.9 | 3.5 | -10.3 | 8.9 | 4 |
| WangGeDang(WGD) | WGD06 | M21 | Longshan culture | - | - | Femur | 43.7 | 15.9 | 3.2 | -8.3 | 9.1 | 4 |
| WangGeDang(WGD) | WGD04 | M16 | Longshan culture | - | - | Tibia | 35.6 | 12.4 | 3.4 | -10.5 | 9.4 | 4 |
| WangGeDang(WGD) | WGD02 | M10 | Longshan culture | - | - | Femur | 42.9 | 16.9 | 3.4 | -9.4 | 9.5 | 4 |
| WangGeDang(WGD) | WGD03 | M15 | Longshan culture | - | - | Femur | 41.9 | 13.7 | 3.6 | -10.4 | 9.9 | 4 |
| WangGeDang(WGD) | WGD05 | M17 | Longshan culture | - | - | Femur | 41.3 | 14.4 | 3.4 | -15.7 | 11.2 | 4 |
| WaDian(WD) | 2017LA03 | WD2–97VT1H16 | Longshan culture | - | - | - | 42.0 | 15.6 | 3.1 | -15.5 | 6.4 | 7 |
| WaDian(WD) | 253 | WD2T4143③ | Longshan culture | - | - | - | 43.3 | 15.1 | 3.3 | -9.6 | 6.8 | 7 |
| WaDian(WD) | 251 | WD2T4143③ | Longshan culture | - | - | - | 43.8 | 15.0 | 3.4 | -9.6 | 7.3 | 7 |
| WaDian(WD) | 252 | WD2T4143③ | Longshan culture | - | - | - | 42.9 | 14.1 | 3.5 | -10.1 | 7.3 | 7 |
| WaDian(WD) | 254 | WD2T4143H27 | Longshan culture | - | - | - | 42.7 | 14.9 | 3.3 | -9.6 | 7.3 | 7 |
| WaDian(WD) | 257 | WD2T4144H46 | Longshan culture | - | - | - | 44.3 | 16.2 | 3.2 | -10.8 | 7.3 | 7 |
| WaDian(WD) | 258 | WD2T4144H46 | Longshan culture | - | - | - | 43.1 | 15.1 | 3.3 | -10.8 | 7.4 | 7 |
| WaDian(WD) | 255 | WD2T4143H27 | Longshan culture | - | - | - | 44.3 | 15.3 | 3.4 | -9.9 | 7.7 | 7 |
| WaDian(WD) | 244 | WD2T4043H2 | Longshan culture | - | - | - | 31.4 | 11.0 | 3.3 | -10.1 | 8.4 | 7 |
| WaDian(WD) | 259 | WD2T4144④ | Longshan culture | - | - | - | 43.8 | 15.5 | 3.3 | -8.7 | 8.4 | 7 |
| WaDian(WD) | 256 | WD2T4143H27 | Longshan culture | - | - | - | 42.1 | 15.0 | 3.3 | -14.5 | 9.9 | 7 |
| WaDian(WD) | 246 | WD2T4043H43 | Longshan culture | - | - | - | 29.9 | 10.7 | 3.3 | -13.4 | 10.3 | 7 |
| WaDian(WD) | 245 | WD2T4043H24 | Longshan culture | - | - | - | 46.5 | 15.2 | 3.6 | -15.0 | 10.4 | 7 |
| WaDian(WD) | 2017LA05 | WD2–97VT1F1 | Longshan culture | - | - | - | 44.3 | 16.5 | 3.1 | -13.7 | 8.1 | 8 |
| WaDian(WD) | 2017LA02 | WD6–97IVT3H58 | Longshan culture | - | - | - | 42.7 | 15.6 | 3.2 | -15.8 | 8.4 | 8 |
| WaDian(WD) | 2017LA08 | WD2–07T3944③ | Longshan culture | - | - | - | 42.5 | 15.8 | 3.1 | -10.6 | 8.6 | 8 |
| WaDian(WD) | 2017LA07 | WD2–07T4044④ | Longshan culture | - | - | - | 44.4 | 16.3 | 3.2 | -13.0 | 9.3 | 8 |
| WaDian(WD) | 2017LA04 | WD6–97IVT5M2 | Longshan culture | - | - | - | 38.1 | 14.1 | 3.2 | -8.9 | 9.5 | 8 |
| WaDian(WD) | 2017LA01 | WD6–97IVT4W1 | Longshan culture | - | - | - | 43.8 | 16.1 | 3.2 | -15.8 | 10.1 | 8 |
| WaDian(WD) | 2017LA06 | WD6–97IVT3W2 | Longshan culture | - | - | - | 43.4 | 15.8 | 3.2 | -9.1 | 10.8 | 8 |
| HaoJiaTai(HJT) |  | M106 | Longshan culture | Male | 15~17 | - |  |  | 3.2 | -8.8 | 7.3 | 8 |
| HaoJiaTai(HJT) |  | M120 | Longshan culture | Female | 50~55 | - |  |  | 3.2 | -11.1 | 8.1 | 8 |
| HaoJiaTai(HJT) |  | M107 | Longshan culture | Unknown | 9±2 | - |  |  | 3.2 | -10.0 | 8.5 | 8 |
| HaoJiaTai(HJT) |  | M109 | Longshan culture | Male | 15±2 | - |  |  | 3.2 | -8.6 | 8.7 | 8 |
| HaoJiaTai(HJT) |  | M117 | Longshan culture | Female | 60± | - |  |  | 3.2 | -10.0 | 8.9 | 8 |
| HaoJiaTai(HJT) |  | M113 | Longshan culture | Male | 60+ | - |  |  | 3.2 | -10.1 | 9.4 | 8 |
| HaoJiaTai(HJT) |  | M118 | Longshan culture | Female | 40± | - |  |  | 3.2 | -20.7 | 9.4 | 8 |
| HaoJiaTai(HJT) |  | M119 | Longshan culture | Male | 50~55 | - |  |  | 3.2 | -8.9 | 9.4 | 8 |
| HaoJiaTai(HJT) |  | M112 | Longshan culture | Unknown | Adult | - |  |  | 3.2 | -17.5 | 10.4 | 8 |
| HaoJiaTai(HJT) |  | M116 | Longshan culture | Female | 40± | - |  |  | 3.2 | -19.2 | 10.5 | 8 |
| HaoJiaTai(HJT) |  | M108 | Longshan culture | Male | 40± | - |  |  | 3.2 | -18.9 | 11.1 | 8 |
| MeiShan(MS) |  | M9 | Longshan culture | - | - | - |  |  | 3.2 | -10.9 | 8.0 | 9 |
| MeiShan(MS) |  | M1 | Longshan culture | - | - | - |  |  | 3.2 | -15.3 | 10.8 | 9 |
| MeiShan(MS) |  | M5 | Longshan culture | - | - | - |  |  | 3.2 | -16.9 | 10.8 | 9 |
| MeiShan(MS) |  | M7 | Longshan culture | - | - | - |  |  | 3.2 | -16.8 | 11.2 | 9 |
| MeiShan(MS) | MS10 | T25H21 | Longshan culture | - | - | Tibia | 29.8 | 10.9 | 3.2 | -8.0 | 7.5 | This study |
| MeiShan(MS) | MS11 | T26④ | Longshan culture | - | - | Skull | 43.4 | 15.7 | 3.2 | -10.0 | 9.1 |
| MeiShan(MS) | MS12 | T27H21 | Longshan culture | - | - | Tibia | 43.0 | 16.0 | 3.1 | -9.2 | 8.3 |
| MeiShan(MS) | MS15 | T33H71 | Longshan culture | - | - | Radius | 43.7 | 15.9 | 3.2 | -13.4 | 8.7 |
| MeiShan(MS) | MS17 | T36③A | Longshan culture | - | - | Humerus | 42.6 | 15.6 | 3.2 | -10.5 | 9.1 |
| MeiShan(MS) | MS2 | T11H35 | Longshan culture | - | - | Radius | 42.9 | 15.8 | 3.2 | -9.6 | 8.4 |
| MeiShan(MS) | MS3 | T15M2 | Longshan culture | - | - | Skull | 43.3 | 15.8 | 3.2 | -11.5 | 8.7 |
| MeiShan(MS) | MS6 | T16H31 | Longshan culture | - | - | Humerus | 42.9 | 15.8 | 3.2 | -11.9 | 9.5 |
| MeiShan(MS) | MS7 | T17③ | Longshan culture | - | - | Femur | 41.4 | 15.0 | 3.2 | -14.1 | 10.8 |
| MeiShan(MS) | MS9 | T19H60 | Longshan culture | - | - | Skull | 40.4 | 14.4 | 3.3 | -12.3 | 9.5 |
| MeiShan(MS) | MS14 | T30H23 | Longshan culture | - | - | Long bone | 42.5 | 15.3 | 3.2 | -16.5 | 11.5 |
| MeiShan(MS) | MS13 | T27F10 | Longshan culture | - | - | Femur | 43.7 | 15.9 | 3.2 | -16.6 | 12.3 |
| MeiShan(MS) | MS8 | T18H50 | Erlitou culture | - | - | Tibia | 44.0 | 16.1 | 3.2 | -7.1 | 8.5 |
| MeiShan(MS) | MS5 | T16H2 | Erlitou culture | - | - | Ulna | 43.7 | 16.0 | 3.2 | -10.4 | 8.7 |
| MeiShan(MS) | MS16 | T34③ | Erlitou culture | - | - | Femur | 43.2 | 15.7 | 3.2 | -6.8 | 9.3 |
| MeiShan(MS) | MS4 | T15H1 | Erlitou culture | - | - | Mandible | 45.2 | 16.4 | 3.2 | -10.9 | 9.5 |
| XinZhai(XZ) | 1 | 1999T4M9 | Longshan culture | Male | 30~40 | - |  |  | 3.0 | -9.9 | 8.2 | 10 |
| XinZhai(XZ) | 2 | 1999T4H53 | Erlitou culture | Male | ~50 | - |  |  | 3.2 | -7.2 | 8.3 | 10 |
| XinZhai(XZ) | 3 | 1999T2M1 | Erlitou culture | Female | 30~35 | - |  |  | 3.3 | -9.2 | 7.8 | 10 |
| XinZhai(XZ) | 4 | 1999T2M2 | Erlitou culture | Female | 15~18 | - |  |  | 3.2 | -11.3 | 10.1 | 10 |
| XinZhai(XZ) | 5 | 1999T2M3 | Erlitou culture | Female | 10~12 | - |  |  | 3.2 | -11.2 | 8.7 | 10 |
| XinZhai(XZ) | 6 | 1999T2M4 | Erlitou culture | Unknown | 5~6 | - |  |  | 3.2 | -8.2 | 10.5 | 10 |
| XinZhai(XZ) | 7 | 1999T2M5 | Erlitou culture | Male | 5~7 | - |  |  | 3.2 | -10.7 | 8.9 | 10 |
| XinZhai(XZ) | 8 | 1999T2M6 | Erlitou culture | Male | ~35 | - |  |  | 3.2 | -9.3 | 9.6 | 10 |
| ErLiTou(ELT) | ELT01 | 2010YLⅤT4729-4731JPH36 | Erlitou culture | - | - | Tibia | 45.0 | 16.6 | 3.2 | -10.1 | 10.9 | 11 |
| ErLiTou(ELT) | ELT02 | 2010YLⅤT3026H2 | Erligang culture | - | - | Metatarsa | 43.8 | 15.8 | 3.2 | -12.1 | 10.5 | 11 |
| ErLiTou(ELT) | ELT03 | 2010YLⅤT2926H3 | Erlitou culture | - | - | Skull | 42.1 | 15.6 | 3.2 | -5.9 | 7.6 | 11 |
| ErLiTou(ELT) | ELT04 | 2010YLⅤT4729-4731JPH43 | Erlitou culture | - | - | Humerus | 44.9 | 16.5 | 3.2 | -9.6 | 8.9 | 11 |
| ErLiTou(ELT) | SP1201 | 00YLⅣT4H20⑥ | Erlitou culture | - | - | - |  |  |  | -8.3 |  | 12 |
| ErLiTou(ELT) | SP1205 | 95YLⅣG3 | Erlitou culture | - | - | - |  |  |  | -7.9 | 10.8 | 12 |
| ErLiTou(ELT) | SP1208 | 85YLⅥT10M4 | Erlitou culture | - | - | - |  |  |  | -8.3 | 9.4 | 12 |
| ErLiTou(ELT) | SP1209 | 85YLⅣT14M21 | Erlitou culture | - | - | - |  |  |  | -7.7 | 12.4 | 12 |
| ErLiTou(ELT) | SP1210 | 95YLⅨM2 | Erlitou culture | - | - | - |  |  |  | -8.9 |  | 12 |
| ErLiTou(ELT) | SP1211 | 88YLⅦT3M1 | Erlitou culture | - | - | - |  |  |  | -8.1 | 8.2 | 12 |
| ErLiTou(ELT) | SP1213 | 85YLⅥM6 | Erlitou culture | - | - | - |  |  |  | -9.3 |  | 12 |
| ErLiTou(ELT) | SP1214 | 95YLⅨH3 | Erlitou culture | - | - | - |  |  |  | -9.1 |  | 12 |
| ErLiTou(ELT) | SP1217 | 89YLⅥT5M55 | Erlitou culture | - | - | - |  |  |  | -10.8 |  | 12 |
| ErLiTou(ELT) | SP1220 | 87YLⅨT6M9 | Erlitou culture | - | - | - |  |  |  | -8.0 |  | 12 |
| ErLiTou(ELT) | SP1224 | 2004YLⅤT72M17 | Erlitou culture | - | - | - |  |  |  | -7.5 |  | 12 |
| ErLiTou(ELT) | SP1225 | 2003YLⅤT35M12 | Erlitou culture | - | - | - |  |  |  | -7.4 |  | 12 |
| ErLiTou(ELT) | SP1226 | 87YLⅥT2M23 | Erlitou culture | - | - | - |  |  |  | -9.3 |  | 12 |
| ErLiTou(ELT) | SP1227 | 2004YLⅤT1M1 | Erlitou culture | - | - | - |  |  |  | -7.8 |  | 12 |
| ErLiTou(ELT) | SP1229 | 95YLⅨH3 | Erlitou culture | - | - | - |  |  |  | -9.2 |  | 12 |
| ErLiTou(ELT) | SP1232 | 04YLⅤT86H305M1 | Erligang culture | - | - | - |  |  |  | -9.2 |  | 12 |
| ErLiTou(ELT) | SP1233 | 2003YLⅤT61M31 | Erlitou culture | - | - | - |  |  |  | -8.4 |  | 12 |
| ErLiTou(ELT) | SP1234 | 2004YLⅤT34M10 | Erlitou culture | - | - | - |  |  |  | -8.2 |  | 12 |
| ErLiTou(ELT) | SP1235 | 04YLⅤT86H305 | Erligang culture | - | - | - |  |  |  | -8.2 |  | 12 |
| ErLiTou(ELT) | SP1236 | 89YLⅥT95 | Erlitou culture | - | - | - |  |  |  | -17.5 |  | 12 |
| ErLiTou(ELT) | SP1238 | 2004YLⅤT86H305M3 | Erligang culture | - | - | - |  |  |  | -10.1 |  | 12 |
| ErLiTou(ELT) | SIA01808 | 2020Ⅸ区人兽祭祀坑① | Erlitou culture |  |  | Rib | 44.9 | 16.2 | 3.2 | -11.5 | 10.4 | 13 |
| ErLiTou(ELT) | SIA01809 | 2020Ⅸ区人兽祭祀坑① | Erlitou culture |  |  | Humerus | 40.6 | 14.8 | 3.2 | -10.9 | 10 | 13 |
| ErLiTou(ELT) | SIA01810 | 2019VM1 | Erlitou culture |  |  | Rib | 43.9 | 15.8 | 3.2 | -10.6 | 9.4 | 13 |
| ErLiTou(ELT) | SIA01811 | 2019VM1 | Erlitou culture |  |  | Humerus | 38.6 | 13.8 | 3.3 | -10.2 | 8.2 | 13 |
| ErLiTou(ELT) | SIA01812 | 2020Ⅸ区人兽祭祀坑北 | Erlitou culture |  |  | Rib | 45.2 | 16.0 | 3.3 | -9.3 | 9.5 | 13 |
| ErLiTou(ELT) | SIA01813 | 2020Ⅸ区人兽祭祀坑北 | Erlitou culture |  |  | Radius | 32.0 | 11.4 | 3.3 | -10.4 | 9.7 | 13 |
| ErLiTou(ELT) | SIA01814 | 2020Ⅸ区人兽祭祀坑人1 | Erlitou culture |  |  | Rib | 45.2 | 16.4 | 3.2 | -8.6 | 7.6 | 13 |
| ErLiTou(ELT) | SIA01815 | 2020Ⅸ区人兽祭祀坑人1 | Erlitou culture |  |  | Tibia | 45.2 | 16.6 | 3.2 | -8.5 | 7.8 | 13 |
| ErLiTou(ELT) | SIA01816 | 2020Ⅸ区人兽祭祀坑人1 | Erlitou culture |  |  | Ulna | 45.3 | 16.4 | 3.2 | -8.5 | 7.5 | 13 |
| ErLiTou(ELT) | SIA01817 | 2020Ⅸ区人兽祭祀坑人2 | Erlitou culture |  |  | Rib | 44.9 | 16.1 | 3.2 | -10.9 | 10.2 | 13 |
| ErLiTou(ELT) | SIA01818 | 2020Ⅸ区人兽祭祀坑人2 | Erlitou culture |  |  | Ulna | 45.5 | 16.4 | 3.2 | -11.1 | 9.9 | 13 |
| ErLiTou(ELT) | SIA01819 | 2020ⅨM9 | Erlitou culture |  |  | Rib | 45.4 | 16.3 | 3.3 | -10.5 | 10.2 | 13 |
| ErLiTou(ELT) | SIA01820 | 2020ⅨM9 | Erlitou culture |  |  | Humerus | 43.9 | 15.8 | 3.2 | -9.6 | 9.4 | 13 |
| ErLiTou(ELT) | SIA01821 | 2020ⅨM10 | Erlitou culture |  |  | Rib | 45.4 | 16.4 | 3.2 | -9.9 | 9.5 | 13 |
| ErLiTou(ELT) | SIA01822 | 2020ⅨM10 | Erlitou culture |  |  | Radius | 44.1 | 15.9 | 3.2 | -9.3 | 9.6 | 13 |
| ErLiTou(ELT) | SIA01824 | 2020ⅨM7 | Erlitou culture |  |  | Rib | 45.0 | 16.1 | 3.3 | -9.0 | 9.6 | 13 |
| ErLiTou(ELT) | SIA01825 | 2020ⅨM7 | Erlitou culture |  |  | Ulna | 45.3 | 16.2 | 3.3 | -12.8 | 10.6 | 13 |
| ErLiTou(ELT) | SIA01826 | 2020ⅨM7 | Erlitou culture |  |  | Metacarpal | 35.0 | 12.2 | 3.3 | -10.2 | 6.6 | 13 |
| ErLiTou(ELT) | SIA01831 | 2020ⅨM8 | Erlitou culture |  |  | Phalange | 45.2 | 16.3 | 3.2 | -11.3 | 10.1 | 13 |
| ErLiTou(ELT) | SIA02232 | 2022YLⅧT4248M2-1 | Erlitou culture |  |  | Humerus | 42.8 | 15.3 | 3.3 | -8.3 | 8.7 | 13 |
| ErLiTou(ELT) | SIA02235 | 2022YLⅧT3850M6 | Erlitou culture |  |  | Rib | 42.0 | 15.3 | 3.2 | -8.6 | 8.6 | 13 |
| ErLiTou(ELT) | SIA02236 | 2022YLⅧT3949M7 | Erlitou culture |  |  | Rib | 44.6 | 16.2 | 3.2 | -11.1 | 9.2 | 13 |
| ErLiTou(ELT) | SIA02237 | 2022YLⅧT3950M9 | Erlitou culture |  |  | Tibia | 42.9 | 15.4 | 3.2 | -9.6 | 9.2 | 13 |
| ErLiTou(ELT) | SIA02238 | 2022YLⅧT4248④ | Erlitou culture |  |  | Skull | 44.3 | 16.0 | 3.2 | -8.8 | 7.3 | 13 |
| NanWa(NW) |  | M11 | Erlitou culture | Unknown | Unknown | Femur | 54.4 | 19.5 | 3.3 | -9.5 | 6.5 | 14 |
| NanWa(NW) |  | M5-2 | Erlitou culture | Unknown | Unknown | Humerus | 40.1 | 14.2 | 3.3 | -10.1 | 6.9 | 14 |
| NanWa(NW) |  | M6 | Erlitou culture | Male | Juvenile | Skull | 48.6 | 17.7 | 3.2 | -9.1 | 7.2 | 14 |
| NanWa(NW) |  | M5-1 | Erlitou culture | Female | Juvenile | Femur | 27.7 | 10.0 | 3.2 | -9.0 | 7.4 | 14 |
| NanWa(NW) |  | M25 | Erlitou culture | Male | Juvenile | Humerus | 43.9 | 15.5 | 3.3 | -9.7 | 7.6 | 14 |
| NanWa(NW) |  | M8 | Erlitou culture | Female | Adult | Humerus | 54.6 | 19.7 | 3.2 | -8.5 | 8.0 | 14 |
| NanWa(NW) |  | M22 | Erlitou culture | Female | Juvenile | Humerus | 45.3 | 15.5 | 3.4 | -10.1 | 8.1 | 14 |
| NanWa(NW) |  | M27 | Erlitou culture | Male | Juvenile | Humerus | 44.1 | 15.7 | 3.3 | -8.8 | 8.4 | 14 |
| NanWa(NW) |  | M20 | Erlitou culture | Male | Juvenile | Humerus | 40.4 | 14.4 | 3.3 | -10.9 | 8.5 | 14 |
| NanWa(NW) |  | M11 | Erlitou culture | Male | Juvenile | Femur | 46.8 | 17.3 | 3.2 | -9.2 | 8.6 | 14 |
| NanWa(NW) |  | M14 | Erlitou culture | Unknown | Juvenile | Humerus | 41.6 | 15.1 | 3.2 | -9.8 | 8.7 | 14 |
| NanWa(NW) |  | M9-2 | Erlitou culture | Unknown | Unknown | Femur | 49.6 | 18.3 | 3.2 | -8.5 | 9.6 | 14 |
| NanWa(NW) |  | M9-1 | Erlitou culture | Male | Adult | Femur | 41.6 | 15.0 | 3.2 | -9.1 | 9.8 | 14 |
| NanWa(NW) |  | M16 | Late Shang period | Unknown | Unknown | Femur | 37.6 | 13.6 | 3.2 | -9.8 | 8.4 | 14 |
| NanWa(NW) |  | M17 | Late Shang period | Unknown | Unknown | Femur | 39.2 | 14.0 | 3.3 | -9.4 | 8.4 | 14 |
| NanWa(NW) |  | M19 | Late Shang period | Female | Juvenile | Femur | 54.7 | 19.4 | 3.3 | -10.3 | 9.1 | 14 |
| NanWa(NW) |  | M32 | Late Shang period | Male | Unknown | Tibia | 39.4 | 14.3 | 3.2 | -8.1 | 9.1 | 14 |
| NanWa(NW) |  | M13 | Late Shang period | Female | Adult | Tibia | 44.1 | 15.8 | 3.3 | -8.6 | 9.5 | 14 |
| NanWa(NW) |  | M29 | Late Shang period | Female | Adult | Tibia | 80.2 | 29.7 | 3.2 | -8.1 | 9.7 | 14 |
| WangJingLou(WJL) | 22 | M50 | Erligang culture | Unknown | 10~13 | Rib | 44.5 | 16.2 | 3.2 | -10.2 | 8.0 | 15 |
| WangJingLou(WJL) | 21 | M48 | Erligang culture | Unknown | 6~8 | Rib | 38.7 | 14.2 | 3.2 | -10.8 | 8.1 | 15 |
| WangJingLou(WJL) | 13 | M22 | Erligang culture | Male | 35~40 | Rib | 43.3 | 16.0 | 3.2 | -7.6 | 8.2 | 15 |
| WangJingLou(WJL) | 29 | M58 | Erligang culture | Male | 30~35 | Long bone | 43.0 | 15.9 | 3.2 | -7.8 | 8.2 | 15 |
| WangJingLou(WJL) | 3 | M3 | Erligang culture | Female | 45~50 | Long bone | 42.2 | 15.6 | 3.2 | -9.7 | 8.3 | 15 |
| WangJingLou(WJL) | 23 | M52 | Erligang culture | Male | 40 | Rib | 41.8 | 15.4 | 3.2 | -8.9 | 8.3 | 15 |
| WangJingLou(WJL) | 24 | M53 | Erligang culture | Female | 30 | Long bone | 42.3 | 15.1 | 3.3 | -8.6 | 8.4 | 15 |
| WangJingLou(WJL) | 1 | M1 | Erligang culture | Female | 35~40 | Long bone | 19.8 | 7.3 | 3.2 | -10.8 | 8.4 | 15 |
| WangJingLou(WJL) | 22 | M50 | Erligang culture | Unknown | 10~13 | Long bone | 40.3 | 14.7 | 3.2 | -10.8 | 8.4 | 15 |
| WangJingLou(WJL) | 23 | M52 | Erligang culture | Male | 40 | Long bone | 44.1 | 16.3 | 3.1 | -9.4 | 8.4 | 15 |
| WangJingLou(WJL) | 24 | M53 | Erligang culture | Female | 30 | Rib | 43.8 | 16.3 | 3.1 | -8.7 | 8.5 | 15 |
| WangJingLou(WJL) | 3 | M3 | Erligang culture | Female | 45~50 | Rib | 44.5 | 16.0 | 3.3 | -9.8 | 8.5 | 15 |
| WangJingLou(WJL) | 16 | M30 | Erligang culture | Female | 30 | Long bone | 44.3 | 16.0 | 3.2 | -9.0 | 8.5 | 15 |
| WangJingLou(WJL) | 28 | M57 | Erligang culture | Unknown | 5~6 | Long bone | 42.4 | 15.8 | 3.1 | -12.8 | 8.6 | 15 |
| WangJingLou(WJL) | 27 | M56 | Erligang culture | Unknown | 2~3 | Long bone | 43.8 | 16.4 | 3.1 | -13.7 | 8.7 | 15 |
| WangJingLou(WJL) | 12 | M21 | Erligang culture | Male | 40 | Long bone | 43.5 | 15.8 | 3.2 | -7.7 | 8.8 | 15 |
| WangJingLou(WJL) | 10 | M19 | Erligang culture | Female | 40 | Long bone | 38.2 | 14.2 | 3.2 | -10.1 | 8.9 | 15 |
| WangJingLou(WJL) | 6 | M10 | Erligang culture | Female | 30 | Rib | 41.1 | 15.1 | 3.2 | -9.8 | 8.9 | 15 |
| WangJingLou(WJL) | 19 | M40 | Erligang culture | Male | 35~40 | Long bone | 42.4 | 15.3 | 3.2 | -7.6 | 8.9 | 15 |
| WangJingLou(WJL) | 27 | M56 | Erligang culture | Unknown | 2~3 | Rib | 43.5 | 15.9 | 3.2 | -13.6 | 8.9 | 15 |
| WangJingLou(WJL) | 9 | M15 | Erligang culture | Male | 40~45 | Rib | 43.3 | 15.7 | 3.2 | -7.5 | 9.0 | 15 |
| WangJingLou(WJL) | 19 | M40 | Erligang culture | Male | 35~40 | Rib | 39.6 | 14.4 | 3.2 | -7.4 | 9.0 | 15 |
| WangJingLou(WJL) | 6 | M10 | Erligang culture | Female | 30 | Long bone | 43.6 | 16.1 | 3.2 | -9.9 | 9.1 | 15 |
| WangJingLou(WJL) | 9 | M15 | Erligang culture | Male | 40~45 | Long bone | 37.3 | 13.4 | 3.3 | -10.4 | 9.2 | 15 |
| WangJingLou(WJL) | 29 | M58 | Erligang culture | Male | 30~35 | Rib | 43.5 | 15.7 | 3.2 | -7.5 | 9.2 | 15 |
| WangJingLou(WJL) | 11 | M20 | Erligang culture | Male | 25~30 | Long bone | 44.1 | 16.1 | 3.2 | -7.1 | 9.2 | 15 |
| WangJingLou(WJL) | 11 | M20 | Erligang culture | Male | 25~30 | Rib | 44.5 | 16.2 | 3.2 | -7.3 | 9.2 | 15 |
| WangJingLou(WJL) | 15 | M25 | Erligang culture | Female | Adult | Rib | 42.2 | 15.2 | 3.2 | -8.0 | 9.2 | 15 |
| WangJingLou(WJL) | 31 | M64 | Erligang culture | Female | 26~28 | Long bone | 38.2 | 14.1 | 3.2 | -8.8 | 9.2 | 15 |
| WangJingLou(WJL) | 31 | M64 | Erligang culture | Female | 26~28 | Rib | 41.9 | 15.3 | 3.2 | -9.0 | 9.2 | 15 |
| WangJingLou(WJL) | 17 | M31 | Erligang culture | Male | 35 | Long bone | 33.1 | 12.1 | 3.2 | -9.4 | 9.5 | 15 |
| WangJingLou(WJL) | 30 | M62 | Erligang culture | Male | 25~30 | Rib | 44.5 | 16.3 | 3.2 | -8.9 | 9.5 | 15 |
| WangJingLou(WJL) | 15 | M25 | Erligang culture | Female | Adult | Long bone | 42.9 | 15.6 | 3.2 | -7.9 | 9.5 | 15 |
| WangJingLou(WJL) | 17 | M31 | Erligang culture | Male | 35 | Rib | 44.7 | 16.3 | 3.2 | -8.9 | 9.6 | 15 |
| WangJingLou(WJL) | 18 | M32 | Erligang culture | Female | 40~45 | Long bone | 43.5 | 16.0 | 3.2 | -9.1 | 9.6 | 15 |
| WangJingLou(WJL) | 30 | M62 | Erligang culture | Male | 25~30 | Long bone | 43.0 | 15.9 | 3.2 | -7.0 | 9.6 | 15 |
| WangJingLou(WJL) | 7 | M12 | Erligang culture | Male | 30 | Long bone | 43.0 | 15.8 | 3.2 | -8.4 | 9.6 | 15 |
| WangJingLou(WJL) | 14 | M24 | Erligang culture | Male | 30~40 | Long bone | 39.7 | 14.2 | 3.3 | -8.6 | 9.6 | 15 |
| WangJingLou(WJL) | 26 | M55 | Erligang culture | Female | 30 | Rib | 43.1 | 15.9 | 3.2 | -13.1 | 9.6 | 15 |
| WangJingLou(WJL) | 25 | M54 | Erligang culture | Male | 30~35 | Rib | 43.6 | 16.0 | 3.2 | -7.9 | 9.7 | 15 |
| WangJingLou(WJL) | 4 | M4 | Erligang culture | Female | 40~45 | Rib | 44.6 | 16.2 | 3.2 | -9.5 | 9.8 | 15 |
| WangJingLou(WJL) | 25 | M54 | Erligang culture | Male | 30~35 | Long bone | 39.3 | 14.6 | 3.1 | -10.6 | 9.8 | 15 |
| WangJingLou(WJL) | 4 | M4 | Erligang culture | Female | 40~45 | Long bone | 35.9 | 13.4 | 3.1 | -11.3 | 9.9 | 15 |
| WangJingLou(WJL) | 18 | M32 | Erligang culture | Female | 40~45 | Rib | 41.8 | 15.0 | 3.3 | -10.1 | 10.0 | 15 |
| WangJingLou(WJL) | 5 | M9 | Erligang culture | Male | 45 | Rib | 44.8 | 16.3 | 3.2 | -7.4 | 10.1 | 15 |
| WangJingLou(WJL) | 26 | M55 | Erligang culture | Female | 30 | Long bone | 43.5 | 15.9 | 3.2 | -18.1 | 10.5 | 15 |
| XiaoShuangQiao(XSQ) | 1 | 2000ZXⅨT238H63 | Middle Shang period | Female | 10~12 | - | 42.8 | 15.3 | 3.3 | -9.4 | 6.0 | 16 |
| XiaoShuangQiao(XSQ) | 2 | 2000ZXⅨT238H63 | Middle Shang period | Female | 20 | - | 42.8 | 15.2 | 3.3 | -7.0 | 8.5 | 16 |
| XiaoShuangQiao(XSQ) | 3 | 2000ZXⅨT238H63 | Middle Shang period | Female | 18~20 | - | 41.3 | 14.8 | 3.3 | -8.1 | 10.0 | 16 |
| XiaoShuangQiao(XSQ) | 4 | 2000ZXⅨT238H63 | Middle Shang period | Female | 15~18 | - | 39.3 | 13.7 | 3.4 | -8.6 | 9.9 | 16 |
| XiaoShuangQiao(XSQ) | 5 | 2000ZXⅨT238H63 | Middle Shang period | Male | 25 | - | 40.1 | 14.2 | 3.3 | -7.7 | 9.1 | 16 |
| XiaoShuangQiao(XSQ) | 6 | 2000ZXⅨT238H63 | Middle Shang period | Male | 20~25 | - | 40.9 | 14.5 | 3.3 | -8.8 | 9.8 | 16 |
| XiaoShuangQiao(XSQ) | 7 | 2000ZXⅨT238H63 | Middle Shang period | Female | 20~25 | - | 41.2 | 14.5 | 3.3 | -9.5 | 10.7 | 16 |
| XiaoShuangQiao(XSQ) | 8 | 2000ZXⅨT238H63 | Middle Shang period | Male | 30~34 | - | 41.4 | 14.7 | 3.3 | -8.0 | 10.3 | 16 |
| XiaoShuangQiao(XSQ) | 9 | 2000ZXⅨT238H63 | Middle Shang period | Unknown | Unknown | - | 41.9 | 15.0 | 3.3 | -7.9 | 9.3 | 16 |
| XiaoShuangQiao(XSQ) | 10 | 2000ZXⅨT238H63 | Middle Shang period | Unknown | Unknown | - | 41.8 | 14.9 | 3.3 | -7.1 | 8.8 | 16 |
| XiaoShuangQiao(XSQ) | 11 | 2000ZXⅨT238H63 | Middle Shang period | Unknown | Unknown | - | 41.4 | 14.8 | 3.3 | -7.6 | 9.1 | 16 |
| XiaoShuangQiao(XSQ) | 12 | 2000ZXⅤT15H66 | Middle Shang period | Male | Adult | - | 42.6 | 15.2 | 3.3 | -9.2 | 9.2 | 16 |
| XiaoShuangQiao(XSQ) | 13 | 2000ZXⅤT15H66 | Middle Shang period | Male | Adult | - | 40.7 | 14.5 | 3.3 | -9.9 | 6.9 | 16 |
| XiaoShuangQiao(XSQ) | 14 | 2000ZXⅤT15H66 | Middle Shang period | Male | Adult | - | 41.7 | 14.7 | 3.3 | -8.6 | 9.8 | 16 |
| XiaoShuangQiao(XSQ) | 15 | 2000ZXⅤT15H66 | Middle Shang period | Male | Adult | - | 43.3 | 15.5 | 3.3 | -11.2 | 7.4 | 16 |
| XiaoShuangQiao(XSQ) | 16 | 2000ZXⅤT15H66 | Middle Shang period | Male | Adult | - | 42.4 | 15.1 | 3.3 | -9.6 | 6.6 | 16 |
| XiaoShuangQiao(XSQ) | 17 | 2000ZXⅤT15H66 | Middle Shang period | Male | Adult | - | 42.9 | 15.2 | 3.3 | -9.6 | 9.3 | 16 |
| XiaoShuangQiao(XSQ) | 18 | 2000ZXⅤT15H66 | Middle Shang period | Male | Adult | - | 42.6 | 15.1 | 3.3 | -11.9 | 10.1 | 16 |
| XiaoShuangQiao(XSQ) | 19 | 2000ZXⅤT15H66 | Middle Shang period | Male | Adult | - | 45.5 | 16.8 | 3.2 | -11.3 | 10.1 | 16 |
| XiaoShuangQiao(XSQ) | 20 | 2000ZXⅤT15H66 | Middle Shang period | Male | Adult | - | 41.3 | 15.2 | 3.2 | -8.5 | 7.3 | 16 |
| XiaoShuangQiao(XSQ) | 21 | 2000ZXⅤT19M38 | Middle Shang period | Unknown | Unknown | - | 40.4 | 14.4 | 3.3 | -11.8 | 9.3 | 16 |
| XiaoShuangQiao(XSQ) | 22 | 1995ZXⅤT68H45 | Middle Shang period | Female | 13~14 | - | 41.9 | 14.9 | 3.3 | -12.2 | 8.3 | 16 |
| XiaoShuangQiao(XSQ) | 23 | 2000ZXⅤT68H45 | Middle Shang period | Female | 13~14 | - | 38.9 | 14.1 | 3.2 | -9.2 | 9.8 | 16 |
| XiaoShuangQiao(XSQ) | 24 | 2000ZXⅤT53H108 | Middle Shang period | Female | 11 | - | 44.7 | 16.1 | 3.2 | -9.6 | 7.8 | 16 |
| XiaoShuangQiao(XSQ) | 25 | 2000ZXⅤT15H110 | Middle Shang period | Unknown | Unknown | - | 41.8 | 15.0 | 3.3 | -8.9 | 10.5 | 16 |
| XiaoShuangQiao(XSQ) | 26 | 2000ZXⅤT95H114 | Middle Shang period | Female | Unknown | - | 43.0 | 15.4 | 3.2 | -12.0 | 10.3 | 16 |
| XiaoShuangQiao(XSQ) | 27 | 2000ZXⅤT95H114 | Middle Shang period | Male | Unknown | - | 42.6 | 15.3 | 3.2 | -10.4 | 6.9 | 16 |
| XiaoShuangQiao(XSQ) | 28 | 2000ZXⅤT57④a | Middle Shang period | Male | 30~35 | - | 40.8 | 14.5 | 3.3 | -9.0 | 10.0 | 16 |
| XiaoShuangQiao(XSQ) | 29 | 2000ZXⅤT57④a | Middle Shang period | Female | ~25 | - | 40.2 | 14.3 | 3.3 | -7.5 | 10.4 | 16 |
| XiaoShuangQiao(XSQ) | 30 | 2000ZXⅤT57④a | Middle Shang period | Male | ~25 | - | 40.8 | 14.5 | 3.3 | -7.9 | 9.5 | 16 |
| XiaoShuangQiao(XSQ) | 31 | 2000ZXⅤT57④a | Middle Shang period | Unknown | 15~17 | - | 41.4 | 14.7 | 3.3 | -9.6 | 9.1 | 16 |
| XiaoShuangQiao(XSQ) | 32 | 2000ZXⅤT95④b | Middle Shang period | Male | 9~11 | - | 37.6 | 13.3 | 3.3 | -10.1 | 10.9 | 16 |
| XiaoShuangQiao(XSQ) | 33 | 2000ZXⅤT95④a | Middle Shang period | Unknown | Unknown | - | 43.0 | 15.4 | 3.2 | -7.9 | 8.0 | 16 |
| XiaoShuangQiao(XSQ) | 34 | 2000ZXⅤT97④a | Middle Shang period | Male | 16~18 | - | 39.9 | 14.3 | 3.3 | -9.1 | 9.5 | 16 |
| XiaoShuangQiao(XSQ) | 35 | 2000ZXⅤT97④a | Middle Shang period | Unknown | Unknown | - | 43.0 | 14.9 | 3.4 | -12.0 | 9.0 | 16 |
| XiaoShuangQiao(XSQ) | 36 | 2000ZXⅤT133④b | Middle Shang period | Male | Unknown | - | 25.1 | 8.7 | 3.4 | -9.6 | 10.4 | 16 |
| XiaoShuangQiao(XSQ) | 37 | 2000ZXⅤT97④a | Middle Shang period | Male | Unknown | - | 40.3 | 14.4 | 3.3 | -11.2 | 9.4 | 16 |
| XiaoShuangQiao(XSQ) | 38 | 2000ZXⅤT135④a | Middle Shang period | Male | Unknown | - | 38.9 | 14.0 | 3.2 | -7.7 | 9.1 | 16 |
| XiaoShuangQiao(XSQ) | 39 | 2000ZXⅤT135④a | Middle Shang period | Male | 15~17 | - | 41.3 | 14.5 | 3.3 | -6.9 | 9.3 | 16 |
| XiaoShuangQiao(XSQ) | 40 | 2000ZXⅤT135④a | Middle Shang period | Unknown | Unknown | - | 41.0 | 14.2 | 3.4 | -8.9 | 10.1 | 16 |
| XiaoShuangQiao(XSQ) | 41 | 2000ZXⅤT135④a | Middle Shang period | Male | 20~22 | - | 40.0 | 14.3 | 3.3 | -12.3 | 10.6 | 16 |
| XiaoShuangQiao(XSQ) | 42 | 2000ZXⅤT135④a | Middle Shang period | Male | 14~16 | - | 41.5 | 15.0 | 3.2 | -8.9 | 6.7 | 16 |
| XiaoShuangQiao(XSQ) | 43 | 2000ZXⅤT135④a | Middle Shang period | Male | ~40 | - | 41.4 | 14.8 | 3.3 | -7.7 | 11.1 | 16 |
| XiaoShuangQiao(XSQ) | 44 | 2000ZXⅨT283④a | Middle Shang period | Male | 40~45 | - | 34.3 | 12.1 | 3.3 | -7.4 | 9.1 | 16 |
| XiaoShuangQiao(XSQ) | 45 | 2000ZXⅨT283④a | Middle Shang period | Male | 16~18 | - | 38.1 | 13.5 | 3.3 | -9.8 | 9.7 | 16 |
| XiaoShuangQiao(XSQ) | 46 | 2000ZXⅨT283④a | Middle Shang period | Unknown | Unknown | - | 42.2 | 15.2 | 3.2 | -7.3 | 9.0 | 16 |
| XiaoShuangQiao(XSQ) | 47 | 2000ZXⅨT283④a | Middle Shang period | Unknown | Unknown | - | 39.4 | 13.8 | 3.3 | -7.9 | 9.4 | 16 |
| XiaoShuangQiao(XSQ) | 48 | 2000ZXⅨT283④b | Middle Shang period | Male | 15~17 | - | 39.1 | 13.9 | 3.3 | -10.1 | 9.9 | 16 |
| XiaoShuangQiao(XSQ) | 49 | 2000ZXⅨT283④a | Middle Shang period | Female | 14~16 | - | 34.1 | 12.2 | 3.3 | -8.3 | 8.5 | 16 |
| XiaoShuangQiao(XSQ) | 50 | 2000ZXⅨT283④a | Middle Shang period | Unknown | Unknown | - | 34.0 | 11.8 | 3.4 | -8.1 | 10.2 | 16 |
| XiaoShuangQiao(XSQ) | 51 | 2000ZXⅨT283④a | Middle Shang period | Unknown | Unknown | - | 38.0 | 13.4 | 3.3 | -7.0 | 9.3 | 16 |
| ZhengZhou ShangCheng(ZZSC) | 1 | M3 | Late Shang period | – |  | – | 43.8 | 16.3 | 3.1 | -7.3 | 12.4 | 17 |
| ZhengZhou ShangCheng(ZZSC) | 2 | M4 | Late Shang period | Male | Middle aged |  | 43.9 | 16.1 | 3.2 | -7.1 | 12.0 | 17 |
| ZhengZhou ShangCheng(ZZSC) | 3 | M5 | Late Shang period | – | – |  | 44.7 | 16.5 | 3.2 | -9.1 | 10.1 | 17 |
| ZhengZhou ShangCheng(ZZSC) | 4 | M6 | Late Shang period | Male | Middle aged |  | 42.5 | 15.6 | 3.2 | -7.3 | 11.1 | 17 |
| ZhengZhou ShangCheng(ZZSC) | 5 | M7 | Late Shang period | Male | Young adult |  | 32.2 | 11.8 | 3.2 | -7.3 | 11.0 | 17 |
| ZhengZhou ShangCheng(ZZSC) | 6 | M8 | Late Shang period | Male | Young and middle-aged |  | 44.9 | 16.3 | 3.2 | -7.3 | 11.6 | 17 |
| ZhengZhou ShangCheng(ZZSC) | 7 | M9 | Late Shang period | Male | Middle aged |  | 43.3 | 16.0 | 3.2 | -18.5 | 10.6 | 17 |
| ZhengZhou ShangCheng(ZZSC) | 8 | M10 | Late Shang period | Male | Young adult |  | 43.5 | 16.0 | 3.2 | -17.3 | 11.3 | 17 |
| ZhengZhou ShangCheng(ZZSC) | 9 | M11 | Late Shang period | – | – |  | 42.4 | 15.4 | 3.2 | -7.4 | 7.4 | 17 |
| ZhengZhou ShangCheng(ZZSC) | 10 | M12 | Late Shang period | Female | Old aged |  | 44.0 | 16.3 | 3.1 | -8.5 | 12.2 | 17 |
| ZhengZhou ShangCheng(ZZSC) | 11 | M13 | Late Shang period | – | Middle aged |  | 42.3 | 15.3 | 3.2 | -7.9 | 10.6 | 17 |
| ZhengZhou ShangCheng(ZZSC) | 12 | M14 | Late Shang period | Male | Middle aged |  | 43.8 | 15.7 | 3.3 | -7.8 | 10.9 | 17 |
| ZhengZhou ShangCheng(ZZSC) | 13 | M15 | Late Shang period | Female | Middle aged |  | 44.8 | 16.1 | 3.2 | -7.9 | 10.7 | 17 |
| ZhengZhou ShangCheng(ZZSC) | 14 | M16 | Late Shang period | Male | Adolescent |  | 46.2 | 16.8 | 3.2 | -7.6 | 10.6 | 17 |
| ZhengZhou ShangCheng(ZZSC) | 15 | M17 | Late Shang period | Male | Adolescent |  | 44.2 | 16.1 | 3.2 | -8.8 | 10.9 | 17 |
| ZhengZhou ShangCheng(ZZSC) | 16 | M21 | Late Shang period | Female | Young adult |  | 42.8 | 15.6 | 3.2 | -7.4 | 11.9 | 17 |
| ZhengZhou ShangCheng(ZZSC) | 17 | M22 | Late Shang period | Male | Middle aged |  | 40.8 | 15.0 | 3.2 | -7.7 | 10.9 | 17 |
| ZhengZhou ShangCheng(ZZSC) | 18 | M23 | Late Shang period | Male | Young adult |  | 44.9 | 16.4 | 3.2 | -7.8 | 12.4 | 17 |
| ZhengZhou ShangCheng(ZZSC) | 19 | M24 | Late Shang period | Female | Middle aged |  | 41.1 | 15.2 | 3.2 | -7.5 | 10.3 | 17 |
| ZhengZhou ShangCheng(ZZSC) | 20 | M25 | Late Shang period | Female | Young adult |  | 43.6 | 15.9 | 3.2 | -16.6 | 9.4 | 17 |
| ZhengZhou ShangCheng(ZZSC) | 21 | M26 | Late Shang period | – | – |  | 42.0 | 15.5 | 3.2 | -7.8 | 11.6 | 17 |
| ZhengZhou ShangCheng(ZZSC) | 22 | M27 | Late Shang period | – | – |  | 44.1 | 16.1 | 3.2 | -8.2 | 11.0 | 17 |
| ZhengZhou ShangCheng(ZZSC) | 23 | M28 | Late Shang period | Male | Middle aged |  | 41.4 | 15.1 | 3.2 | -7.3 | 11.3 | 17 |
| ZhengZhou ShangCheng(ZZSC) | 24 | M29 | Late Shang period | Female | Middle aged |  | 43.9 | 16.1 | 3.2 | -7.9 | 10.2 | 17 |
| ZhengZhou ShangCheng(ZZSC) | 25 | M31 | Late Shang period | Male | Middle aged |  | 45.9 | 16.9 | 3.2 | -7.5 | 11.6 | 17 |
| ZhengZhou ShangCheng(ZZSC) | 26 | M33 | Late Shang period | Female | Middle and old aged |  | 44.5 | 16.2 | 3.2 | -7.3 | 12.6 | 17 |
| ZhengZhou ShangCheng(ZZSC) | 27 | M34 | Late Shang period | Female | Middle aged |  | 45.0 | 16.1 | 3.3 | -19.8 | 6.5 | 17 |
| ZhengZhou ShangCheng(ZZSC) | 28 | M43 | Late Shang period | – |  |  | 43.5 | 15.9 | 3.2 | -8.3 | 12.2 | 17 |
| ZhengZhou ShangCheng(ZZSC) | 29 | M1 | Late Shang period | – |  |  | 25.0 | 9.1 | 3.2 | -13.1 | 10.2 | 17 |
| ZhengZhou ShangCheng(ZZSC) | 30 | H7 | Late Shang period | – |  |  | 41.8 | 15.3 | 3.2 | -19.9 | 16.6 | 17 |
| ZhengZhou ShangCheng(ZZSC) | 1 | M8 | Late Shang period | Male | 45~50 | - | 29.9 | 11.5 | 3.0 | -8.8 | 12.8 | 18 |
| ZhengZhou ShangCheng(ZZSC) | 2 | M24 | Late Shang period | Male | 55± | - | 38.6 | 14.0 | 3.2 | -8.1 | 10.7 | 18 |
| ZhengZhou ShangCheng(ZZSC) | 3 | M27 | Late Shang period | Unknown | 55± | - | 41.0 | 14.9 | 3.2 | -7.8 | 10.3 | 18 |
| ZhengZhou ShangCheng(ZZSC) | 4 | M30 | Late Shang period | Unknown | Unknown | - | 42.1 | 15.3 | 3.2 | -15.2 | 7.6 | 18 |
| ZhengZhou ShangCheng(ZZSC) | 5 | M39 | Late Shang period | Unknown | 40~45 | - | 40.2 | 14.9 | 3.1 | -8.6 | 6.7 | 18 |
| ZhengZhou ShangCheng(ZZSC) | 6 | M46 | Late Shang period | Unknown | 35± | - | 39.7 | 14.4 | 3.2 | -8.8 | 7.5 | 18 |
| ZhengZhou ShangCheng(ZZSC) | 7 | M47 | Late Shang period | Unknown | 25-30 | - | 38.4 | 14.1 | 3.2 | -7.5 | 8.2 | 18 |
| ZhengZhou ShangCheng(ZZSC) | 8 | M52 | Late Shang period | Unknown | Unknown | - | 41.4 | 15.2 | 3.2 | -6.4 | 10.9 | 18 |
| ZhengZhou ShangCheng(ZZSC) | 9 | M89 | Late Shang period | Unknown | 50-55 | - | 41.2 | 15.2 | 3.2 | -7.4 | 8.2 | 18 |
| ZhengZhou ShangCheng(ZZSC) | 10 | M90 | Late Shang period | Male | 40-45 | - | 39.6 | 14.7 | 3.2 | -9.3 | 10.8 | 18 |
| ZhengZhou ShangCheng(ZZSC) | 11 | M105 | Late Shang period | Male | Unknown | - | 40.0 | 14.8 | 3.1 | -8.0 | 9.2 | 18 |
| ZhengZhou ShangCheng(ZZSC) | 12 | M116 | Late Shang period | Female | 45± | - | 37.5 | 13.5 | 3.2 | -8.5 | 9.2 | 18 |
| ZhengZhou ShangCheng(ZZSC) | 1 | C8HQM1 | Erlitou culture |  |  |  | 40.3 | 14.6 | 3.2 | -7.9 | 9.2 | 19 |
| ZhengZhou ShangCheng(ZZSC) | 2 | C811QM3 | Erlitou culture |  |  |  | 38.1 | 13.9 | 3.2 | -7.0 | 9.8 | 19 |
| ZhengZhou ShangCheng(ZZSC) | 3 | C811QM4 | Erlitou culture |  |  |  | 41.6 | 15.1 | 3.2 | -8.1 | 9.8 | 19 |
| ZhengZhou ShangCheng(ZZSC) | 4 | C811QM5 | Erlitou culture |  |  |  | 40.8 | 14.9 | 3.2 | -11.3 | 9.5 | 19 |
| ZhengZhou ShangCheng(ZZSC) | 5 | CSM3 | Proto Shang culture |  |  |  | 38.1 | 14.1 | 3.2 | -10.1 | 9.9 | 19 |
| ZhengZhou ShangCheng(ZZSC) | 6 | C5M6 | Proto Shang culture |  |  |  | 41.2 | 15 | 3.2 | -7.0 | 9.1 | 19 |
| ZhengZhou ShangCheng(ZZSC) | 7 | C5M20 | Proto Shang culture |  |  |  | 42.1 | 15.3 | 3.2 | -9.0 | 8.9 | 19 |
| ZhengZhou ShangCheng(ZZSC) | 8 | C5M36 | Proto Shang culture |  |  |  | 41 | 14.9 | 3.2 | -8.0 | 9.5 | 19 |
| ZhengZhou ShangCheng(ZZSC) | 9 | CSM53 | Proto Shang culture |  |  |  | 41 | 14.9 | 3.2 | -8.7 | 10.1 | 19 |
| ZhengZhou ShangCheng(ZZSC) | 10 | C5M56 | Proto Shang culture |  |  |  | 40.2 | 14.7 | 3.2 | -8.7 | 9.8 | 19 |
| ZhengZhou ShangCheng(ZZSC) | 11 | C5M57 | Proto Shang culture |  |  |  | 41.6 | 15.1 | 3.2 | -8.8 | 9.2 | 19 |
| ZhengZhou ShangCheng(ZZSC) | 12 | C5M60 | Proto Shang culture |  |  |  | 40.9 | 14.9 | 3.2 | -9.6 | 7.9 | 19 |
| ZhengZhou ShangCheng(ZZSC) | 13 | C5M63 | Proto Shang culture |  |  |  | 38.9 | 14 | 3.2 | -8.4 | 8.5 | 19 |
| ZhengZhou ShangCheng(ZZSC) | 14 | C5M64 | Proto Shang culture |  |  |  | 40 | 14.5 | 3.2 | -8.0 | 9.4 | 19 |
| ZhengZhou ShangCheng(ZZSC) | 15 | C5M65 | Proto Shang culture |  |  |  | 37.6 | 13.2 | 3.3 | -20.0 | 10.4 | 19 |
| ZhengZhou ShangCheng(ZZSC) | 16 | C5M67 | Proto Shang culture |  |  |  | 37.1 | 13.5 | 3.2 | -15.6 | 9.1 | 19 |
| ZhengZhou ShangCheng(ZZSC) | 17 | C5M68 | Proto Shang culture |  |  |  | 39.4 | 14.2 | 3.2 | -10.0 | 8.4 | 19 |
| ZhengZhou ShangCheng(ZZSC) | 18 | C5M72 | Proto Shang culture |  |  |  | 41.6 | 15.2 | 3.2 | -8.3 | 8.1 | 19 |
| ZhengZhou ShangCheng(ZZSC) | 19 | C5M73 | Proto Shang culture |  |  |  | 40.3 | 14.8 | 3.2 | -7.9 | 8.3 | 19 |
| ZhengZhou ShangCheng(ZZSC) | 20 | C5M75 | Proto Shang culture |  |  |  | 40.2 | 14.5 | 3.2 | -10.1 | 9.3 | 19 |
| ZhengZhou ShangCheng(ZZSC) | 21 | C5M76 | Proto Shang culture |  |  |  | 41.4 | 15.1 | 3.2 | -8.3 | 8.4 | 19 |
| ZhengZhou ShangCheng(ZZSC) | 22 | C5M77 | Proto Shang culture |  |  |  | 41.4 | 15.1 | 3.2 | -18.1 | 8.6 | 19 |
| ZhengZhou ShangCheng(ZZSC) | 23 | C5M79* | Proto Shang culture |  |  |  | 42.5 | 13.6 | 3.7 | -10.2 | 8.9 | 19 |
| ZhengZhou ShangCheng(ZZSC) | 24 | C5M80 | Proto Shang culture |  |  |  | 40.2 | 14.6 | 3.2 | -20.1 | 13.4 | 19 |
| ZhengZhou ShangCheng(ZZSC) | 25 | C5M82 | Proto Shang culture |  |  |  | 40.8 | 14.9 | 3.2 | -8.2 | 8.8 | 19 |
| ZhengZhou ShangCheng(ZZSC) | 26 | C5M84 | Proto Shang culture |  |  |  | 39.2 | 14.3 | 3.2 | -8.2 | 8.4 | 19 |
| ZhengZhou ShangCheng(ZZSC) | 27 | C5M85 | Proto Shang culture |  |  |  | 42 | 15.2 | 3.2 | -12.1 | 10.5 | 19 |
| ZhengZhou ShangCheng(ZZSC) | 28 | C5M86 | Proto Shang culture |  |  |  | 39.9 | 14.4 | 3.2 | -9.9 | 10.0 | 19 |
| ZhengZhou ShangCheng(ZZSC) | 29 | C5M87 | Proto Shang culture |  |  |  | 40.2 | 14.7 | 3.2 | -9.5 | 10.2 | 19 |
| ZhengZhou ShangCheng(ZZSC) | 30 | C1M1 | Erligang culture |  |  |  | 38.5 | 13.9 | 3.2 | -8.2 | 9.4 | 19 |
| ZhengZhou ShangCheng(ZZSC) | 31 | C1M40 | Erligang culture |  |  |  | 37 | 13.5 | 3.2 | -8.3 | 6.2 | 19 |
| ZhengZhou ShangCheng(ZZSC) | 32 | C8M3 | Erligang culture |  |  |  | 41.4 | 15 | 3.2 | -7.5 | 8.8 | 19 |
| ZhengZhou ShangCheng(ZZSC) | 33 | C8M9 | Erligang culture |  |  |  | 40.8 | 14.8 | 3.2 | -7.4 | 9.5 | 19 |
| ZhengZhou ShangCheng(ZZSC) | 34 | C8M11 | Erligang culture |  |  |  | 41.1 | 15 | 3.2 | -8.5 | 13.0 | 19 |
| ZhengZhou ShangCheng(ZZSC) | 35 | 987SC8ⅡT225M01 | Erligang culture |  |  |  | 42 | 15.3 | 3.2 | -13.2 | 10.8 | 19 |
| ZhengZhou ShangCheng(ZZSC) | 36 | 01ZSC8I T52M1 | Erligang culture |  |  |  | 42 | 15.3 | 3.2 | -8.7 | 9.8 | 19 |
| ZhengZhou ShangCheng(ZZSC) | 37 | 01ZSC8IT52M3 | Erligang culture |  |  |  | 41 | 14.9 | 3.2 | -7.8 | 9.9 | 19 |
| ZhengZhou ShangCheng(ZZSC) | 38 | 037SC8IT76M3 | Erligang culture |  |  |  | 37.4 | 13.9 | 3.1 | -10.3 | 9.7 | 19 |
| ZhengZhou ShangCheng(ZZSC) | 39 | 037SC8IT87M4 | Erligang culture |  |  |  | 41 | 14.9 | 3.2 | -8.6 | 9.3 | 19 |
| ZhengZhou ShangCheng(ZZSC) | 40 | 037SC8IT88M6 | Erligang culture |  |  |  | 37.9 | 13.8 | 3.2 | -8.4 | 8.9 | 19 |
| ZhengZhou ShangCheng(ZZSC) | 41 | 03ZSC8IVT87M1 | Erligang culture |  |  |  | 42 | 15.2 | 3.2 | -10.8 | 10.0 | 19 |
| ZhengZhou ShangCheng(ZZSC) | 42 | C11M127 | Erligang culture |  |  |  | 40 | 14.6 | 3.2 | -9.1 | 9.7 | 19 |
| ZhengZhou ShangCheng(ZZSC) | 43 | C11M128 | Erligang culture |  |  |  | 41.2 | 15 | 3.2 | -9.4 | 9.0 | 19 |
| ZhengZhou ShangCheng(ZZSC) | 44 | C11M129 | Erligang culture |  |  |  | 41.4 | 15.1 | 3.2 | -10.7 | 10.4 | 19 |
| ZhengZhou ShangCheng(ZZSC) | 45 | C11M150 | Erligang culture |  |  |  | 40.1 | 14.3 | 3.3 | -10.5 | 10.8 | 19 |
| ZhengZhou ShangCheng(ZZSC) | 46 | C7M3 | Late Shang period |  |  |  | 40.9 | 14.8 | 3.2 | -8.3 | 14.7 | 19 |
| ZhengZhou ShangCheng(ZZSC) | 47 | C7M4 | Late Shang period |  |  |  | 33.1 | 12.2 | 3.2 | -8.7 | 13.9 | 19 |
| ZhengZhou ShangCheng(ZZSC) | 48 | C7M10 | Late Shang period |  |  |  | 41.5 | 14.9 | 3.2 | -9.8 | 12.4 | 19 |
| ZhengZhou ShangCheng(ZZSC) | 49 | C7M15 | Late Shang period |  |  |  | 40.8 | 14.8 | 3.2 | -7.0 | 9.4 | 19 |
| ZhengZhou ShangCheng(ZZSC) | 50 | C7M16 | Late Shang period |  |  |  | 41 | 15 | 3.2 | -8.1 | 13.1 | 19 |
| ZhengZhou ShangCheng(ZZSC) | 51 | C7M17 | Late Shang period |  |  |  | 41.7 | 15.3 | 3.2 | -9.3 | 13.0 | 19 |
| ZhengZhou ShangCheng(ZZSC) | 52 | C7M27 | Late Shang period |  |  |  | 41 | 14.8 | 3.2 | -10.1 | 11.4 | 19 |
| ZhengZhou ShangCheng(ZZSC) | 53 | C7M35 | Late Shang period |  |  |  | 41.3 | 15 | 3.2 | -8.3 | 8.7 | 19 |
| ZhengZhou ShangCheng(ZZSC) | 54 | C7M45 | Late Shang period |  |  |  | 41.7 | 15.1 | 3.2 | -10.0 | 10.3 | 19 |
| ZhengZhou ShangCheng(ZZSC) | 55 | C7M46 | Late Shang period |  |  |  | 36.3 | 13.5 | 3.1 | -10.5 | 10.6 | 19 |
| ZhengZhou ShangCheng(ZZSC) | 56 | C7M47 | Late Shang period |  |  |  | 40.7 | 14.5 | 3.3 | -8.7 | 10.6 | 19 |
| ZhengZhou ShangCheng(ZZSC) | 57 | C7M53 | Late Shang period |  |  |  | 40.9 | 15.0) | 3.2 | -9.0 | 9.0 | 19 |
| ZhengZhou ShangCheng(ZZSC) | 58 | C7M104 | Late Shang period |  |  |  | 42 | 15.3 | 3.2 | -6.8 | 9.6 | 19 |
| ZhengZhou ShangCheng(ZZSC) | 60 | C7M113:1 | Late Shang period |  |  |  | 40.3 | 14.7 | 3.2 | -10.0 | 9.2 | 19 |

References

1. Zhang, X. et al. Studies on diet of the ancient people of the Yangshao Cultural sites in the Central Plains. *Acta Anthropologica Sinica* **29**, 197-207 (2010).
2. Tao, D., Liu, F., Ren, G., Richards, M.P. & Zhang, G. Complexity of agricultural economies in the Yiluo region in the late Neolithic and bronze age (3500–221 BC): An integrated stable isotope and archaeobotanical study from the Tumen site, North China. *International Journal of Osteoarchaeology* **31**, 1079-1094 (2021).
3. Wang, X. et al. Multi‐Isotope analysis reveals human millet‐based diets and limited mobility in the Central Plains of China ca. 5000 Years Ago. *International Journal of Osteoarchaeology* **35**, e3407(2025).
4. Chen, X. Wu, Y. & Li, Z. Subsitence around 3t millennium B.C. in Luoyang Basin evidenced by human diets at Zhangou and Wanggedang sites. *Quaternary Sciences* **39**, 197-208 (2019).
5. Deng, C., Gao, Z., Wu, Q., Zhou, Y. & Guo, Y. Millet agriculture and social complexity in the Central Plains of the Neolithic (9000-5000 BP): Isotopic reconstruction of human diet from the Shanggangyang site in China. *Journal of Archaeological Science* **161**, 105893 (2024).
6. Tao, D. et al. Human diets, crop patterns, and settlement hierarchies in third millennium BC China: Bioarchaeological perspectives in Zhengluo region. *Journal of Archaeological Science* **145**, 105647 (2022).
7. Chen, X.L. et al. Isotopic Reconstruction of the Late Longshan Period (ca. 4200-3900 BP) Dietary Complexity before the Onset of State-Level Societies at the Wadian Site in the Ying River Valley, Central Plains, China. *International Journal of Osteoarchaeology* **26**, 808-817 (2016).
8. Li, W. et al. Interdisciplinary study on dietary complexity in Central China during the Longshan Period (4.5–3.8 kaBP): New isotopic evidence from Wadian and Haojiatai, Henan Province. *The Holocene* **31**, 258-270 (2021).
9. Zhou, L. A study of the tombs and society of the Henan Longshan culture by means of stable carbon and nitrogen isotope analysis. *HuaXia Archaeology* **3**, 145-152 (2017).
10. Wu, X. et al. Implications for agriculture subsistence and pig husbandry from stable isotope evidence of human and pig diets in Xinzhai, Henan province, in *Science for Archaeology*, Vol. 2. (ed. Center for Scientific Archaeology of IA-CASS) 50-58 (Science Press, Beijing; 2007).
11. Chen, X., Li, Z. & Zhao, H. Feeding practices of animals from sacrificial pits in the No.1 huge pit of Erlitou site, Yanshi, Henan Province. *Quaternary Sciences* **40**, 407-417 (2020).
12. Zhang, X., Qiu, S., Bo, G., Wang, J. & Zhong, J. d13C and d15N analysis of human bone samples from Erlitou and Taosi sites, in *Science for Archaeology,* Vol. 2. (ed. Center for Scientific Archaeology of IA-CASS) 41-48 (Science Press, Beijing; 2007).
13. Chen, X., Zhao, H., Li, Z. & Wang, M. Research on Ancient Residents' Diet and Patterns of Livestock Rearing at Erlitou Site. *Huaxia Archaeology* **2**, 47-59 (2025).
14. Zhang, G. et al. Reconstructing diets and subsistence strategies of the Bronze Age humans from the Central Plains of China: A stable isotopic study on the Nanwa site. *International Journal of Osteoarchaeology* **30**, 362-374 (2020).
15. Wang, N., Sang, Z., Liu, X. & Wu, Q. A preliminary study on the multi-crops planting system in the central plains of the early Shang Dynasty: taking the Wangjinglou Site, Xinzheng, Henan as an example. *Acta Anthropologica Sinica* **41**, 96-107 (2022).
16. Wang, N. et al. Study on the dietary pattern and local isotopes of the Xiaoshuangqiao Shang Dynasty (1400 BC) site in China. *International Journal of Osteoarchaeology* **32**, 584-594 (2022).
17. Wang, N., Wang, Y., Tao, S., Wu, Q. The study of superiority of China agricultural system in late Shang (1250–1046BC): New evidence from archaeological stable isotopes (in Chinese). *Scientia Sinica Terrae* **51**, 92-102 (2021). doi: 10.1360/SSTe-2020-0115
18. Wang, N., Jia, L., Si, Y. & Jia, X. Isotopic Results Reveal Possible Links between Diet and Social Status in Late Shang Dynasty (ca. 1250–1046 BC) Tombs at Xiaohucun, China. *Atmosphere* **11**, 451 (2020).
19. Wang, N. et al. Carbon and nitrogen stable isotope analysis shedding light on population structure of Shang City Ruins in Zhengzhou. *Huxia Archaeology* **5**, 106-115(2022).
