# Supplementary material for: Stable Carbon and Nitrogen Isotope Analysis for subsistence Shift and Dietary Differentiation from the Late Neolithic to the early Bronze Ages in the Central Plains, China
Source: Research Square preprint supplement (doi:10.21203/rs.3.rs-8751401/v1), 2026-02-23
Supplement: Supplementary file 3 [file ecf77988c1c8ae9cc336cc2e.docx]

**Table S1 Sample information and isotope data of the human and animal bones from the MeiShan site, Henan Province, China.**

| **Lab No.** | **Context** | **Phase** | **Species** | **Age** | **Element** | **Collagen content** | **C(%)** | **N(%)** | **C:N** | **δ13C(‰)** | **δ15N(‰)** |
| --- | --- | --- | --- | --- | --- | --- | --- | --- | --- | --- | --- |
| MS1 | T11 | Unknown | Human |  | Ulna | 4.6% | 41.2 | 14.9 | 3.2 | -9.5 | 8.1 |
| MS2 | T11H35 | Longshan culture | Human |  | Radius | 5.6% | 42.9 | 15.8 | 3.2 | -9.6 | 8.4 |
| MS3 | T15M2 | Longshan culture | Human | Child | Skull | 5.9% | 43.3 | 15.8 | 3.2 | -11.5 | 8.7 |
| MS4 | T15H1 | Erlitou culture | Human |  | Mandible | 4.0% | 45.2 | 16.4 | 3.2 | -10.9 | 9.5 |
| MS5 | T16H2 | Erlitou culture | Human |  | Ulna | 7.4% | 43.7 | 16.0 | 3.2 | -10.4 | 8.7 |
| MS6 | T16H31 | Longshan culture | Human |  | Humerus | 7.7% | 42.9 | 15.8 | 3.2 | -11.9 | 9.5 |
| MS7 | T17③ | Longshan culture | Human |  | Femur | 4.9% | 41.4 | 15.0 | 3.2 | -14.1 | 10.8 |
| MS8 | T18H50 | Erlitou culture | Human |  | Tibia | 10.7% | 44.0 | 16.1 | 3.2 | -7.1 | 8.5 |
| MS9 | T19H60 | Longshan culture | Human |  | Skull | 0.7% | 40.4 | 14.4 | 3.3 | -12.3 | 9.5 |
| MS10 | T25H21 | Longshan culture | Human |  | Tibia | 3.1% | 29.8 | 10.9 | 3.2 | -8.0 | 7.5 |
| MS11 | T26④ | Longshan culture | Human |  | Skull | 7.1% | 43.4 | 15.7 | 3.2 | -10.0 | 9.1 |
| MS12 | T27H21 | Longshan culture | Human |  | Tibia | 2.9% | 43.0 | 16.0 | 3.1 | -9.2 | 8.3 |
| MS13 | T27F10 | Longshan culture | Human | Child | Femur | 10.2% | 43.7 | 15.9 | 3.2 | -16.6 | 12.3 |
| MS14 | T30H23 | Longshan culture | Human | Baby | Long bone | 4.6% | 42.5 | 15.3 | 3.2 | -16.5 | 11.5 |
| MS15 | T33H71 | Longshan culture | Human |  | Radius | 7.0% | 43.7 | 15.9 | 3.2 | -13.4 | 8.7 |
| MS16 | T34③ | Longshan culture | Human |  | Femur | 8.4% | 43.2 | 15.7 | 3.2 | -6.8 | 9.3 |
| MS17 | T36③A | Longshan culture | Human |  | Humerus | 3.6% | 42.6 | 15.6 | 3.2 | -10.5 | 9.1 |
| MS18 | T10H1 | Yinxu period | Pig |  | Mandible | 8.0% | 44.1 | 16.0 | 3.2 | -8.4 | 6.6 |
| MS19 | T11④ | Longshan culture | Pig |  | Mandible | 3.6% | 43.0 | 15.4 | 3.3 | -9.9 | 7.4 |
| MS20 | T11④ | Longshan culture | Pig |  | Mandible | 5.7% | 24.1 | 8.8 | 3.2 | -10.7 | 8.6 |
| MS21 | T11④ | Longshan culture | Pig |  | Malor tooth | 3.0% | 42.2 | 15.2 | 3.3 | -15.4 | 8.6 |
| MS22 | T15④ | Longshan culture | Pig |  | Mandible | 9.6% | 37.4 | 13.9 | 3.1 | -18.2 | 9.6 |
| MS23 | T16H2 | Erlitou culture | Pig |  | Mandible | 4.7% | 42.3 | 15.6 | 3.2 | -6.8 | 6.6 |
| MS24 | T25H27 | Longshan culture | Pig |  | Mandible | 9.1% | 40.9 | 14.9 | 3.2 | -6.0 | 6.3 |
| MS25 | T27F10 | Longshan culture | Pig |  | Phalanx | 6.9% | 43.7 | 16.3 | 3.1 | -17.1 | 8.6 |
| MS26 | T28③ | Erlitou culture | Pig |  | Mandible | 4.0% | 41.7 | 15.2 | 3.2 | -12.8 | 7.9 |
| MS27 | T28③ | Erlitou culture | Pig |  | Mandible | 1.1% | 37.9 | 13.5 | 3.3 | -12.2 | 7.7 |
| MS28 | T28③ | Erlitou culture | Pig |  | Mandible | 5.7% | 43.0 | 15.2 | 3.3 | -14.0 | 7.4 |
| MS29 | T31③ | Longshan culture | Pig |  | Mandible | 2.1% | 40.3 | 14.4 | 3.3 | -15.9 | 8.8 |
| MS30 | T31H66 | Erlitou culture | Pig |  | Mandible | 4.1% | 43.7 | 15.5 | 3.3 | -8.2 | 7.9 |
| MS31 | T32H82 | Longshan culture | Pig |  | Mandible | 5.5% | 43.6 | 15.7 | 3.3 | -12.0 | 7.3 |
| MS32 | T32H84 | Longshan culture | Pig |  | Mandible | 1.5% | 41.9 | 14.9 | 3.3 | -10.0 | 7.3 |
| MS33 | T32H84 | Longshan culture | Pig |  | Mandible | 6.6% | 43.7 | 15.5 | 3.3 | -9.7 | 5.9 |
| MS34 | T32H84 | Longshan culture | Pig |  | Mandible | 4.0% | 43.4 | 15.5 | 3.3 | -15.0 | 7.1 |
| MS35 | T33④ | Longshan culture | Pig |  | Mandible | 2.6% | 42.9 | 15.5 | 3.2 | -10.2 | 7.3 |
| MS36 | T33H71 | Longshan culture | Pig |  | Mandible | 4.4% | 43.5 | 15.8 | 3.2 | -11.9 | 6.7 |
| MS37 | T33H80 | Longshan culture | Pig |  | Mandible | 3.6% | 43.3 | 15.5 | 3.2 | -6.6 | 5.8 |
| MS38 | T10H1 | Yinxu period | Dog |  | Mandible | 5.9% | 43.7 | 15.7 | 3.2 | -8.4 | 7.1 |
| MS39 | T24H26 | Longshan culture | Dog |  | Mandible | 1.6% | 40.5 | 14.7 | 3.2 | -10.3 | 8.3 |
| MS40 | T27③ | Longshan culture | Dog |  | Mandible | 7.5% | 43.2 | 15.4 | 3.3 | -8.7 | 6.3 |
| MS41 | T27F10 | Longshan culture | Dog |  | Mandible | 2.3% | 40.6 | 14.5 | 3.3 | -10.0 | 7.9 |
| MS42 | T28③ | Erlitou culture | Dog |  | Mandible | 5.9% | 43.2 | 15.7 | 3.2 | -8.9 | 7.6 |
| MS43 | T11H38 | Unknown | Cattle |  | Humerus | 6.4% | 40.9 | 14.8 | 3.2 | -8.2 | 5.5 |
| MS44 | T18H50 | Erlitou culture | Cattle |  | Femur | 6.3% | 43.6 | 15.9 | 3.2 | -12.5 | 7.7 |
| MS45 | T19②B | Longshan culture | Cattle |  | Mandible | 10.4% | 35.0 | 12.9 | 3.2 | -7.0 | 3.5 |
| MS46 | T31H66 | Erlitou culture | Cattle |  | Mandible | 1.5% | 29.2 | 10.7 | 3.2 | -11.8 | 7.4 |
| MS56 | T16H2 | Erlitou culture | Cattle |  | Mandible | 5.1% | 41.7 | 15.3 | 3.2 | -11.6 | 10.0 |
| MS47 | T34③ | Longshan culture | Sheep |  | Mandible | 2.9% | 42.2 | 15.0 | 3.3 | -18.6 | 3.7 |
| MS48 | T16H2 | Erlitou culture | Sheep |  | Mandible | 2.9% | 43.3 | 15.5 | 3.3 | -11.6 | 5.9 |
| MS49 | T17② | Yinxu period | Sheep |  | Mandible | 5.6% | 41.4 | 14.7 | 3.3 | -15.0 | 3.8 |
| MS50 | T17③ | Longshan culture | Sheep |  | Mandible | 5.6% | 43.3 | 15.5 | 3.3 | -18.6 | 3.4 |
| MS51 | T27③ | Longshan culture | Sheep |  | Mandible | 3.2% | 43.8 | 15.9 | 3.2 | -17.9 | 3.2 |
| MS52 | T31H66 | Erlitou culture | Sheep |  | Mandible | 8.4% | 43.4 | 15.8 | 3.2 | -18.9 | 2.6 |
| MS53 | T33④ | Longshan culture | Sheep |  | Mandible | 4.8% | 42.9 | 15.6 | 3.2 | -17.3 | 3.2 |
| MS54 | T33H80 | Longshan culture | Sheep |  | Mandible | 4.2% | 43.5 | 15.4 | 3.3 | -14.9 | 5.2 |
| MS55 | T10H1 | Yinxu period | Cervid |  | Scapula | 6.3% | 43.1 | 15.5 | 3.2 | -20.6 | 5.0 |
| MS57 | T18H50 | Erlitou culture | Cervid |  | Tibia | 9.5% | 43.4 | 16.0 | 3.2 | -19.4 | 3.2 |
| MS58 | T25H21 | Longshan culture | Cervid |  | Femur | 6.3% | 43.6 | 16.0 | 3.2 | -18.7 | 3.0 |
| MS60 | T31H66 | Erlitou culture | Cervid |  | Radius | 1.9% | 42.8 | 15.9 | 3.1 | -15.9 | 4.5 |
| MS61 | T31H66 | Erlitou culture | Cervid |  | Scapula | 5.3% | 43.7 | 15.8 | 3.2 | -15.7 | 3.6 |
| MS62 | T32H84 | Longshan culture | Cervid |  | Scapula | 6.1% | 43.9 | 16.0 | 3.2 | -18.7 | 3.5 |
| MS63 | T34③ | Longshan culture | Cervid |  | Tibia | 5.1% | 43.3 | 15.9 | 3.2 | -19.2 | 3.4 |
| MS64 | T34③ | Longshan culture | Cervid |  | Humerus | 5.2% | 35.4 | 13.1 | 3.2 | -19.2 | 3.8 |
| MS65 | T27F10 | Longshan culture | Felis |  | Humerus | 12.3% | 42.7 | 15.5 | 3.2 | -15.3 | 7.6 |
